# Supplementary material for: Impianti realizzativi: formazione permanente
Source: Royal Society of Chemistry journal article supplement (doi:10.1039/c8cp01557k), 2002-01-01
Supplement: c8cp01557k1.pdf [file c8cp01557k1.pdf]

## **Ion pairing in 1-butyl-3-methylpyridinium halides ionic liquids studied by NMR and DFT calculations**

Vincent P. Swamy,<sup>\*a</sup> Hirekodathakallu V. Thulasiram,<sup>b</sup> Federico Rastrelli,<sup>c</sup> and Giacomo Saielli<sup>\*d</sup>

### **Electronic Supporting Information**

|                                         |       |
|-----------------------------------------|-------|
| Additional NMR spectra                  | p. 2  |
| Synthesis and characterization          | p. 11 |
| xyz coordinates of optimized structures | p. 21 |

# NMR of the pure samples

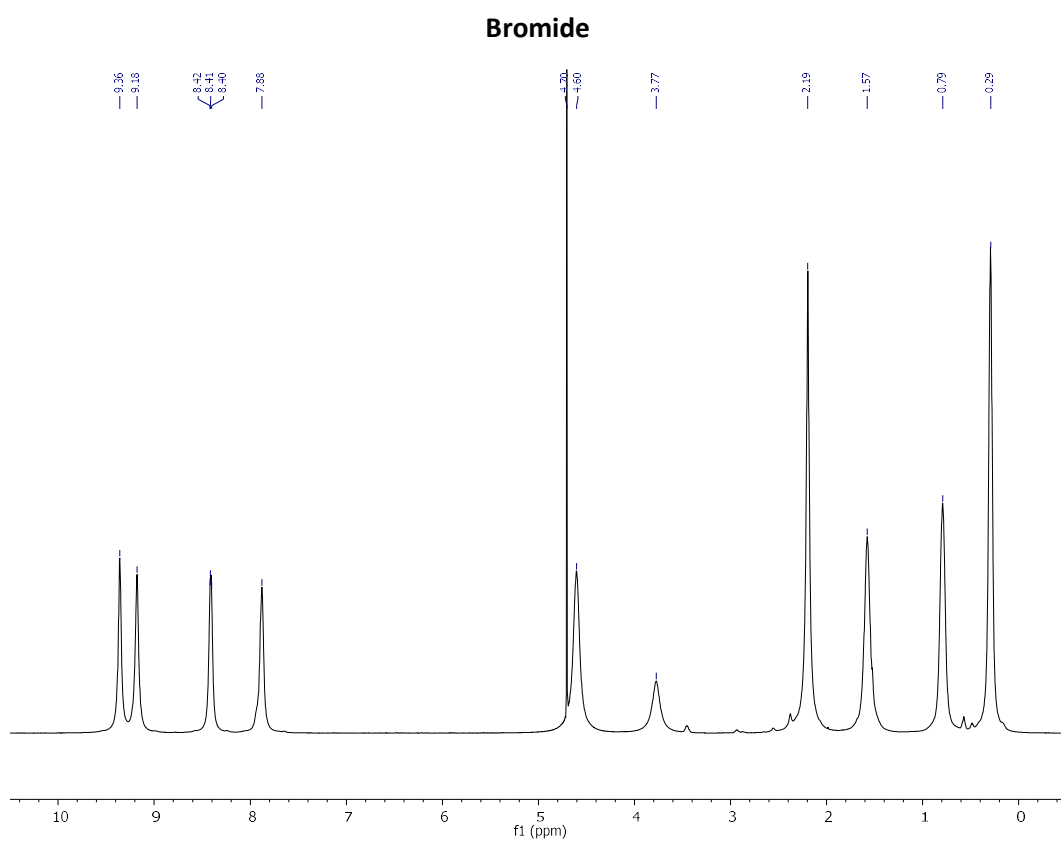

Fig. S1.  $^1\text{H}$  NMR spectrum of neat [BMP][Br]. T = 313.1K

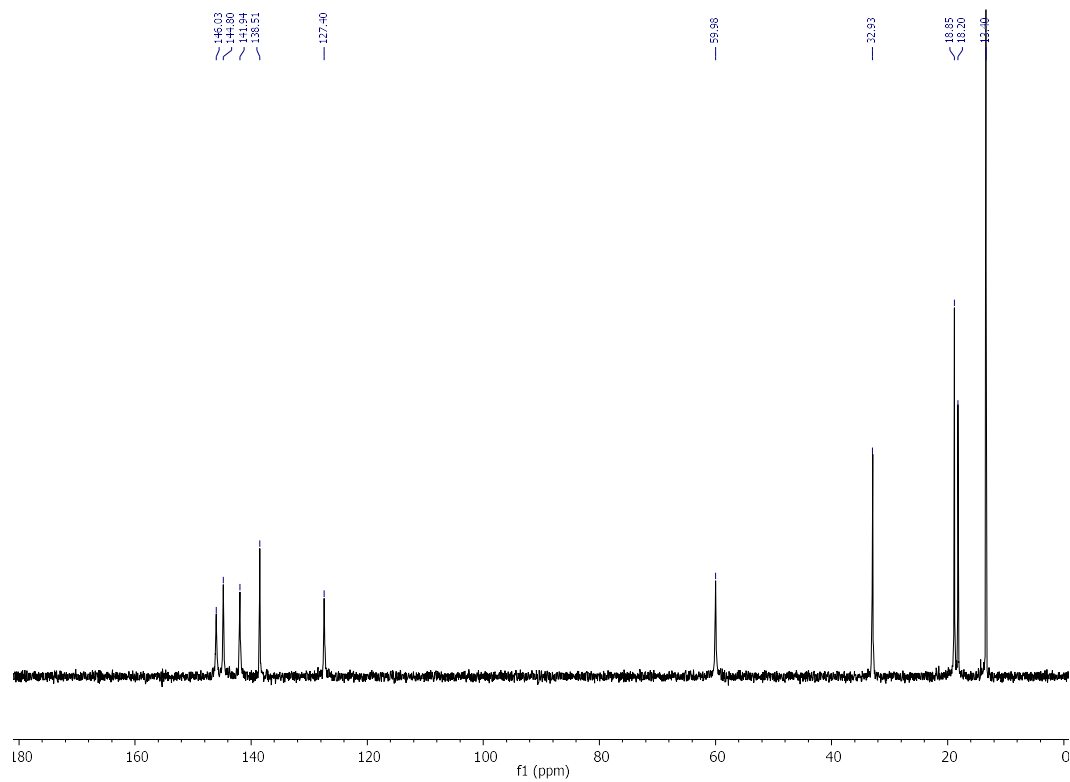

Fig. S2.  $^{13}\text{C}$  NMR spectrum of neat [BMP][Br]. T = 313.1K

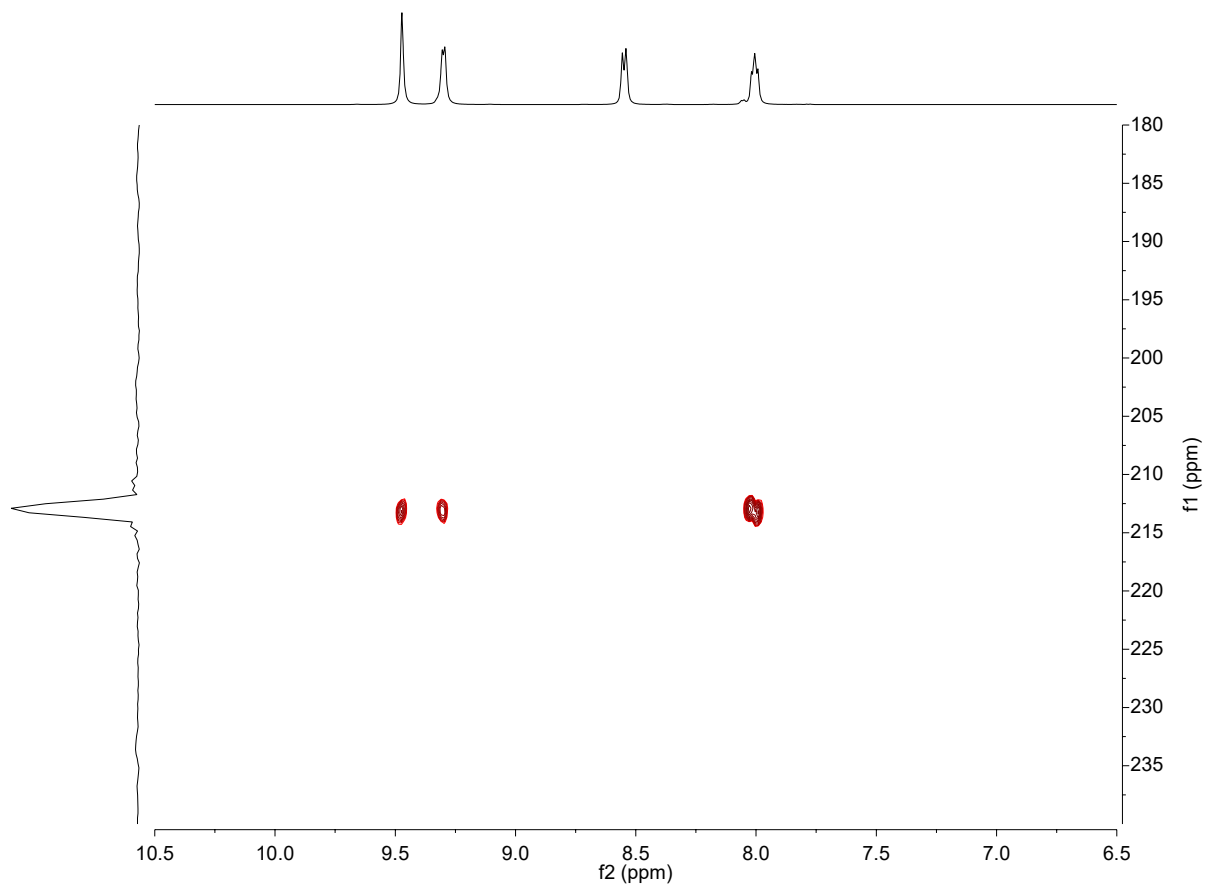

Fig. S3.  $^1\text{H}$ - $^{15}\text{N}$  HMBC sub-spectrum of neat[BMP][Br].T = 313.1K

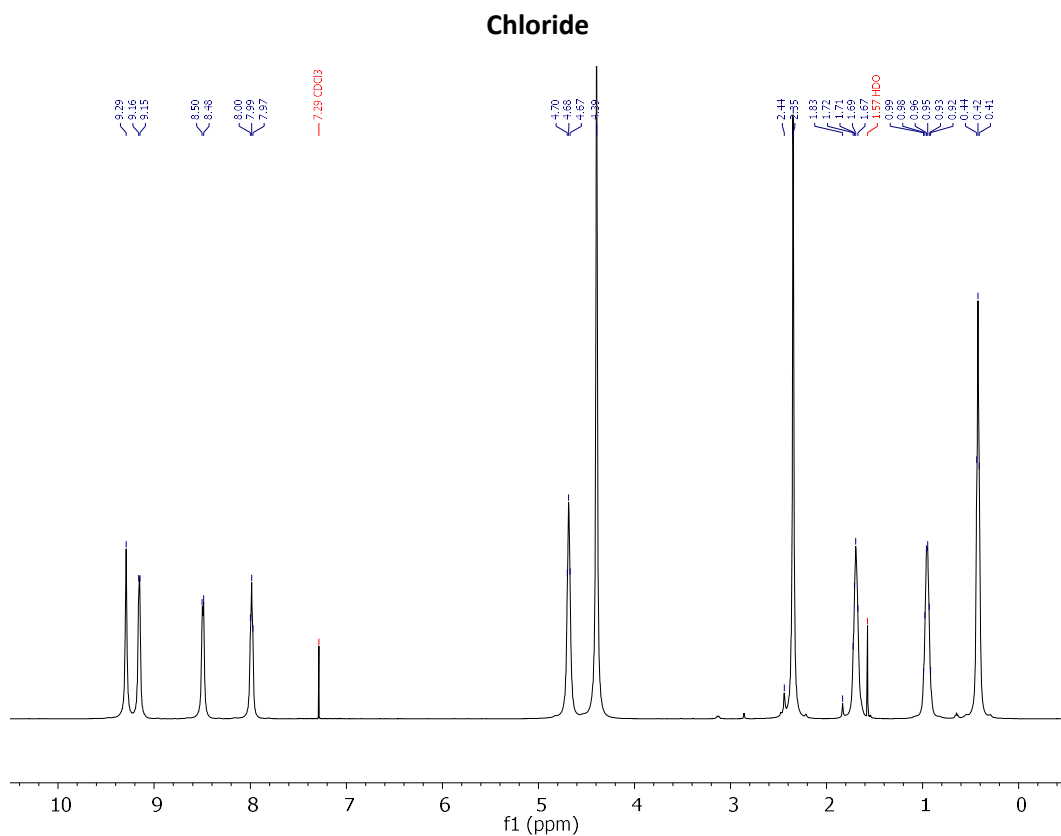

Fig. S4.  $^1\text{H}$  NMR spectrum of neat [BMP][Cl]. T = 298.1K

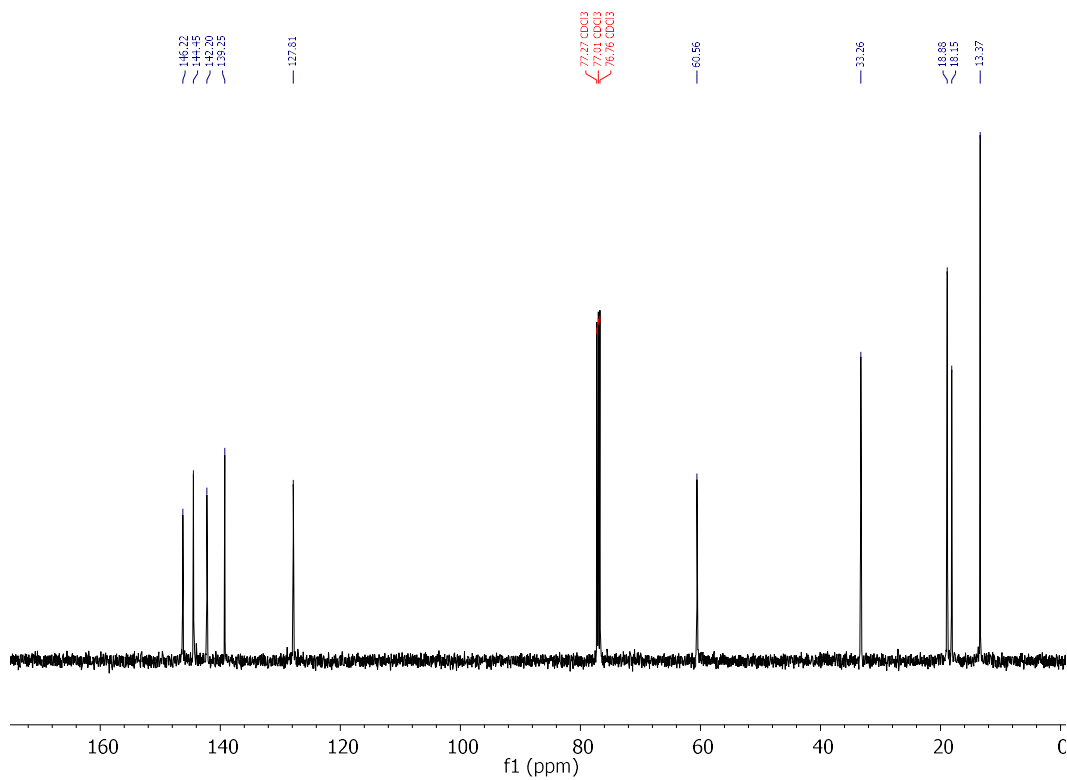

Fig. S5.  $^{13}\text{C}$  NMR spectrum of neat [BMP][Cl]. T = 298.1K

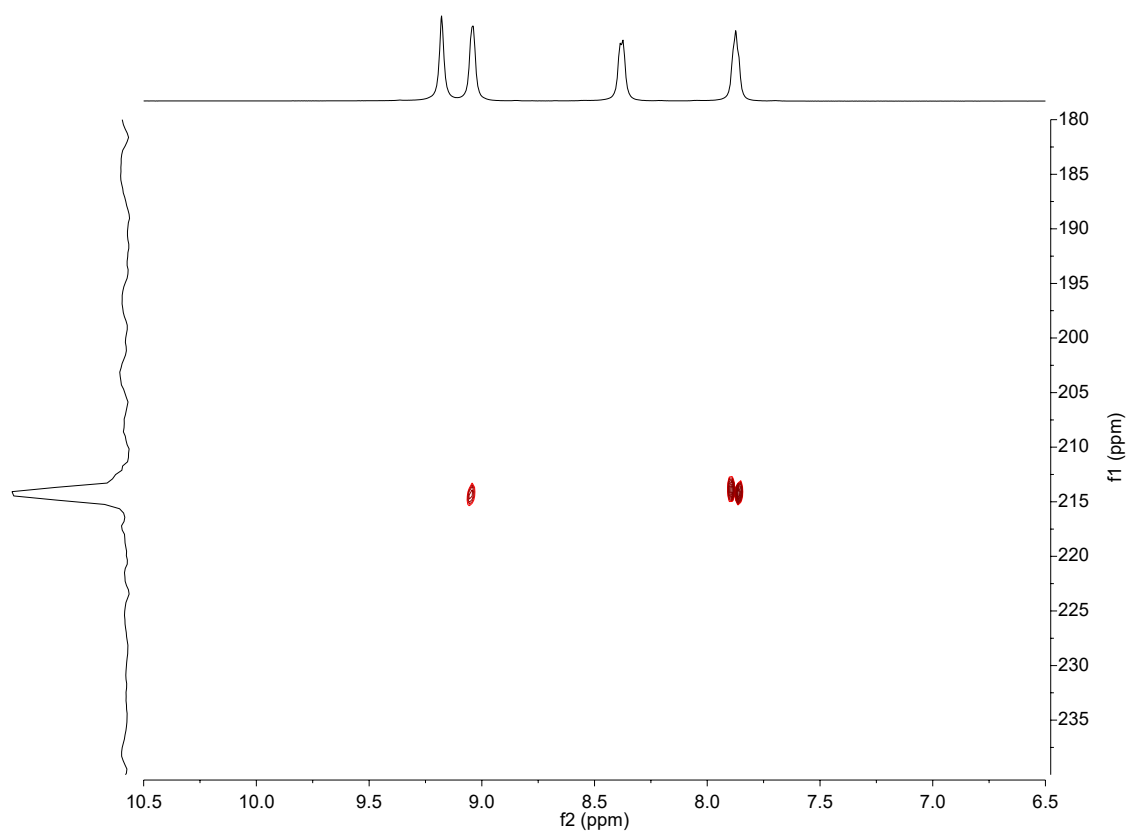

Fig. S6.  $^1\text{H}$ - $^{15}\text{N}$  HMBC sub-spectrum of neat[BMP][Cl].T = 298.1K

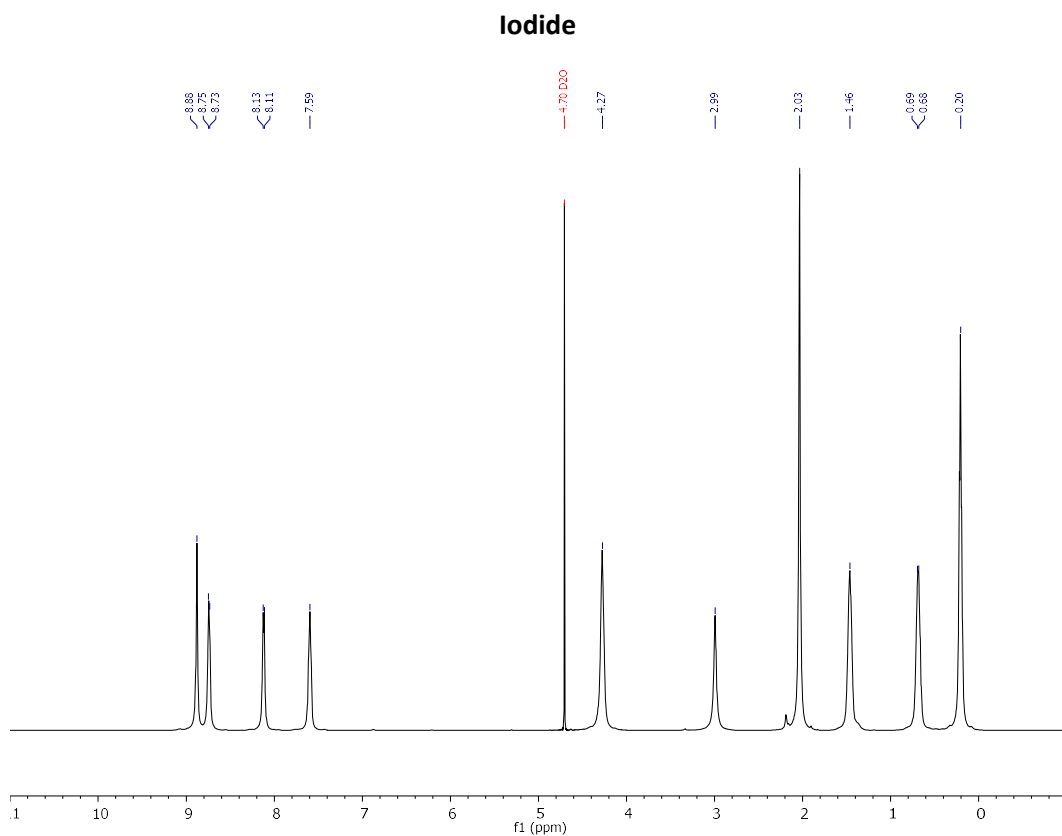

Fig. S7.  $^1\text{H}$  NMR spectrum of neat [BMP][I]. T = 298.1K

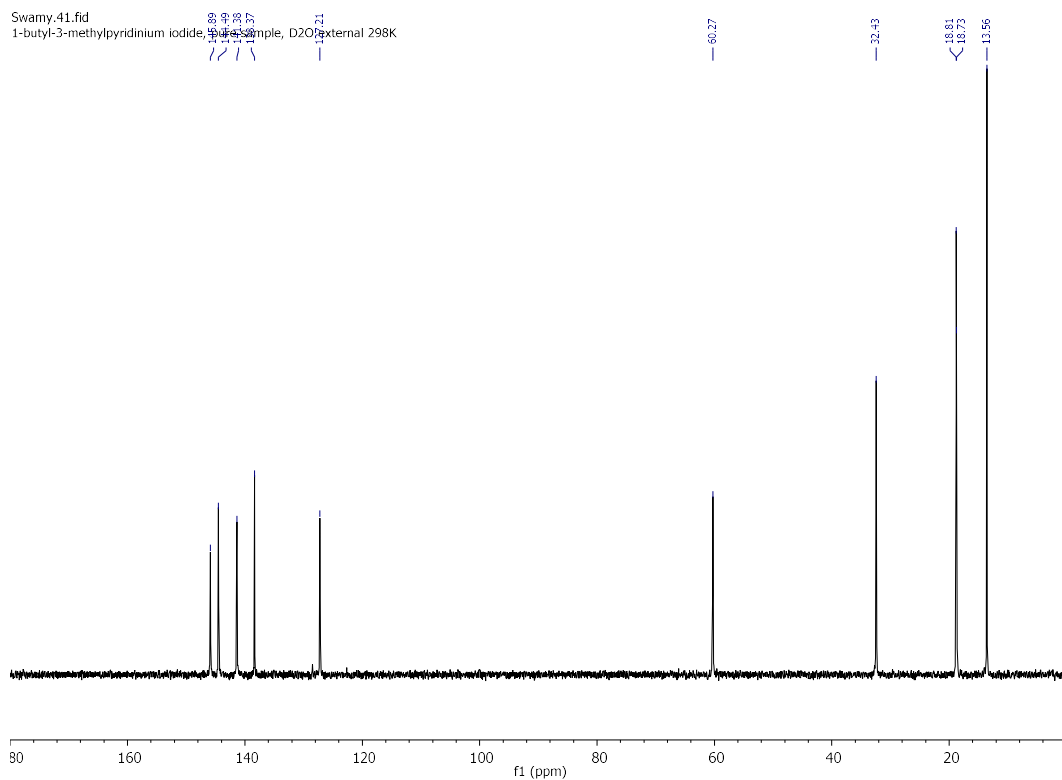

Fig. S8.  $^{13}\text{C}$  NMR spectrum of neat [BMP][I]. T = 298.1K

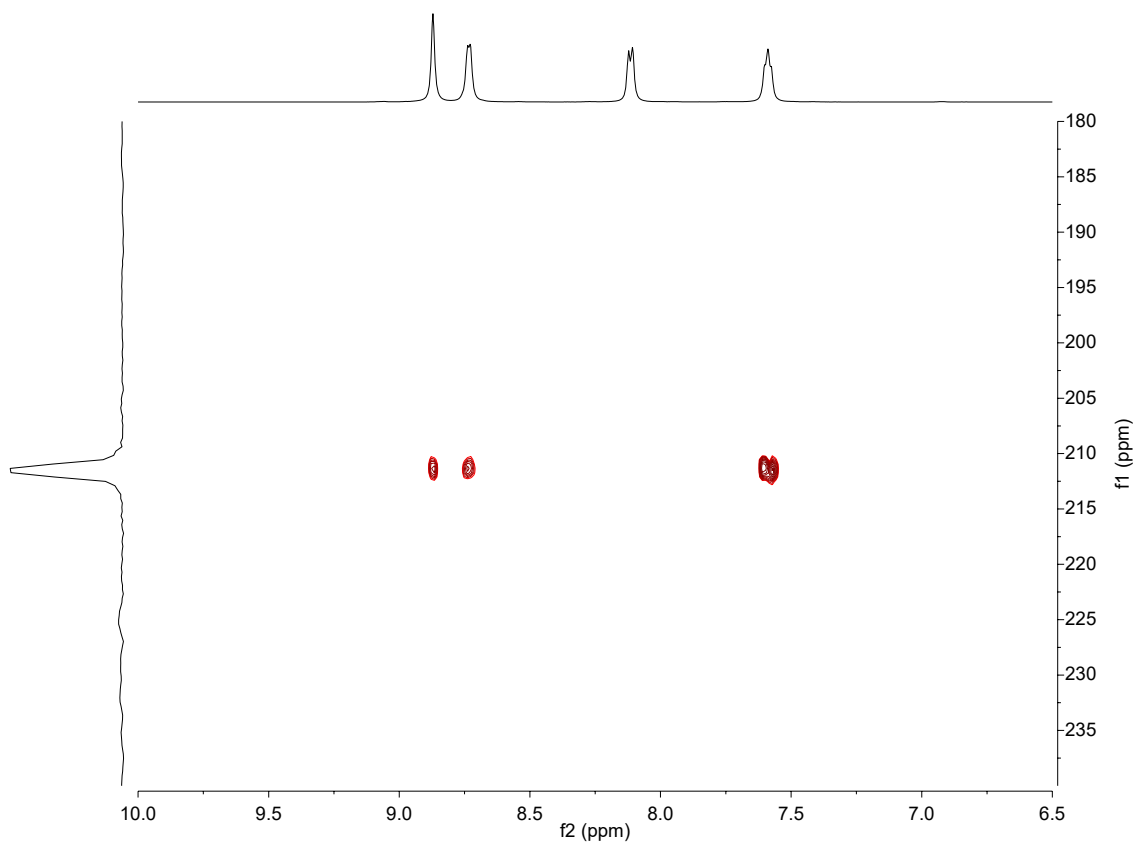

Fig. S9.  $^1\text{H}$ - $^{15}\text{N}$  HMBC sub-spectrum of neat[BMP][I]. T = 298.1 K

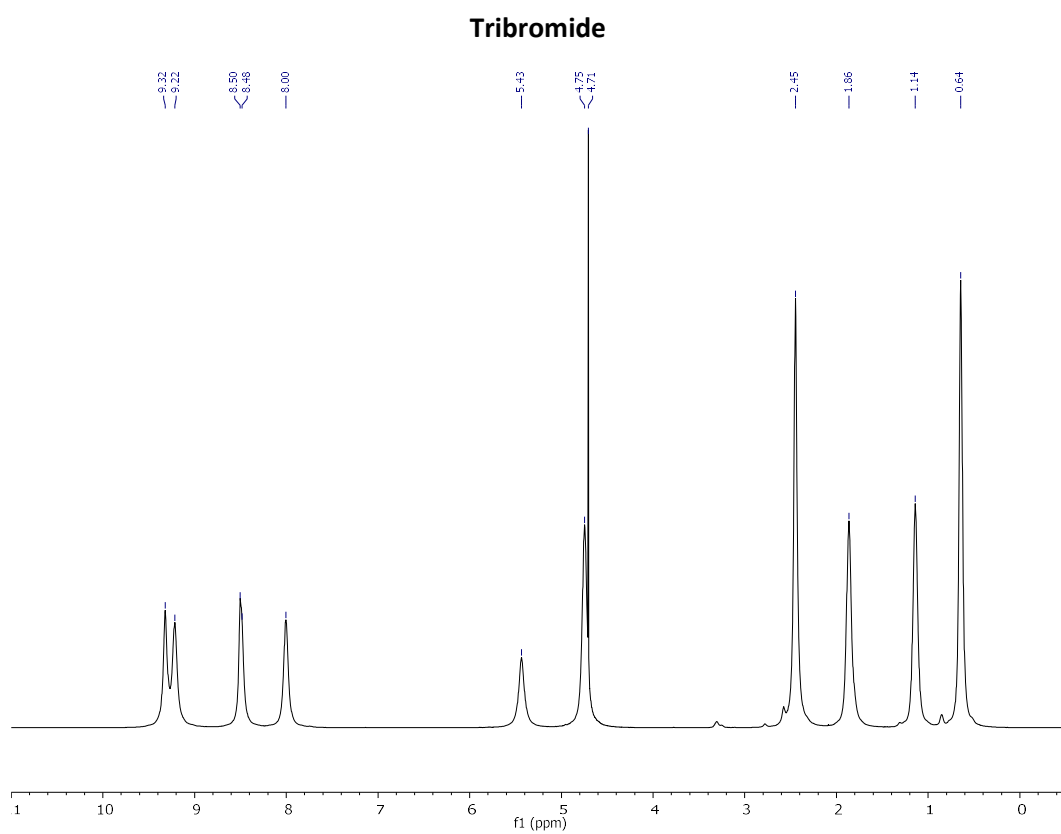

Fig. S10.  $^1\text{H}$  NMR spectrum of neat [BMP][Br<sub>3</sub><sup>-</sup>]. T = 308.1K

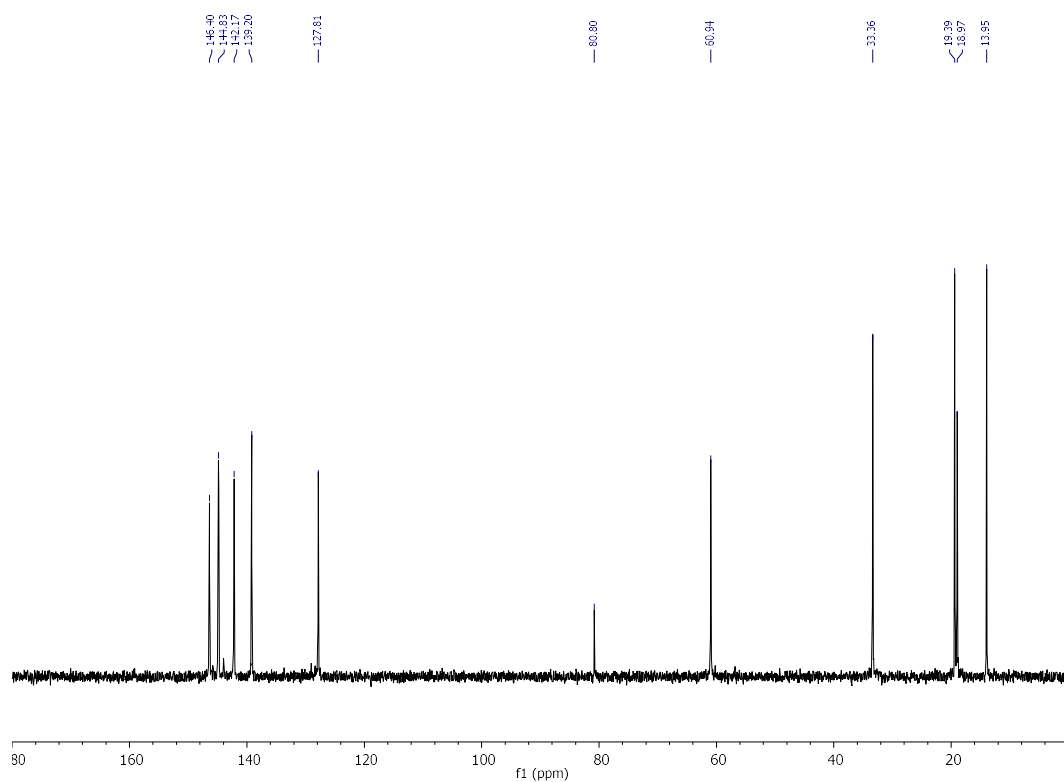

Fig. S11.  $^{13}\text{C}$  NMR spectrum of neat  $[\text{BMP}][\text{Br}_3^-]$ .  $T = 308.1\text{K}$



### Chloride in CD<sub>3</sub>OD

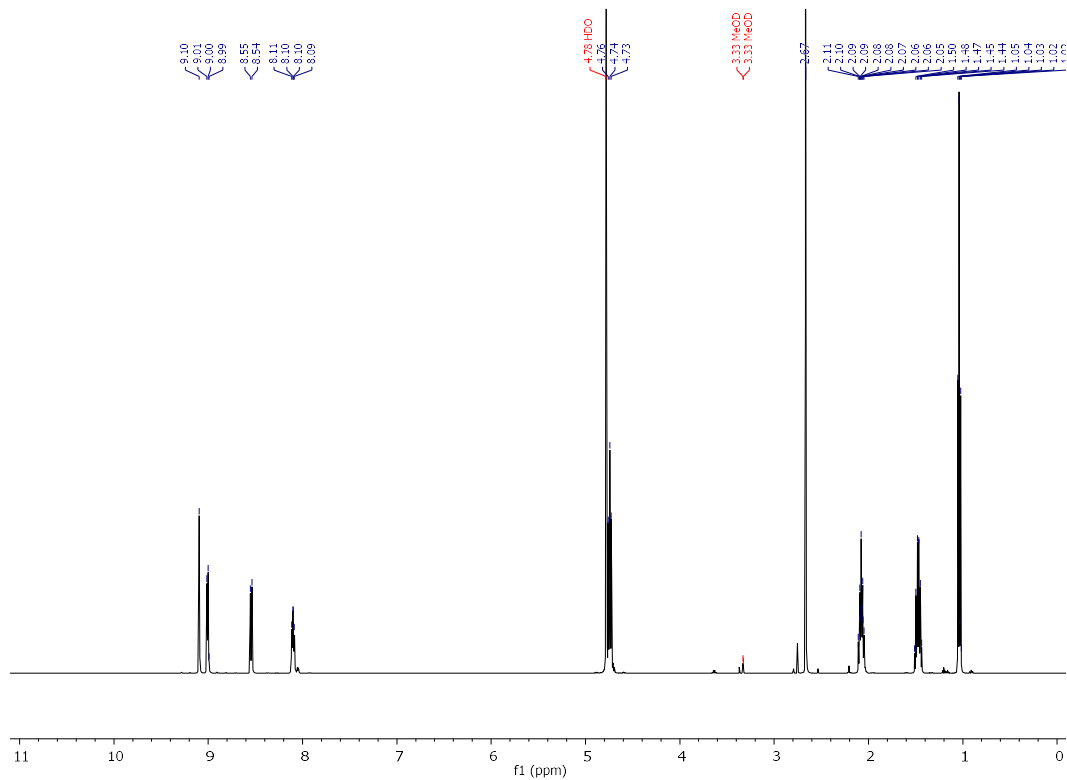

Fig. S12. <sup>1</sup>H NMR spectrum of [BMP][Cl] in CD<sub>3</sub>OD. T = 298.1K

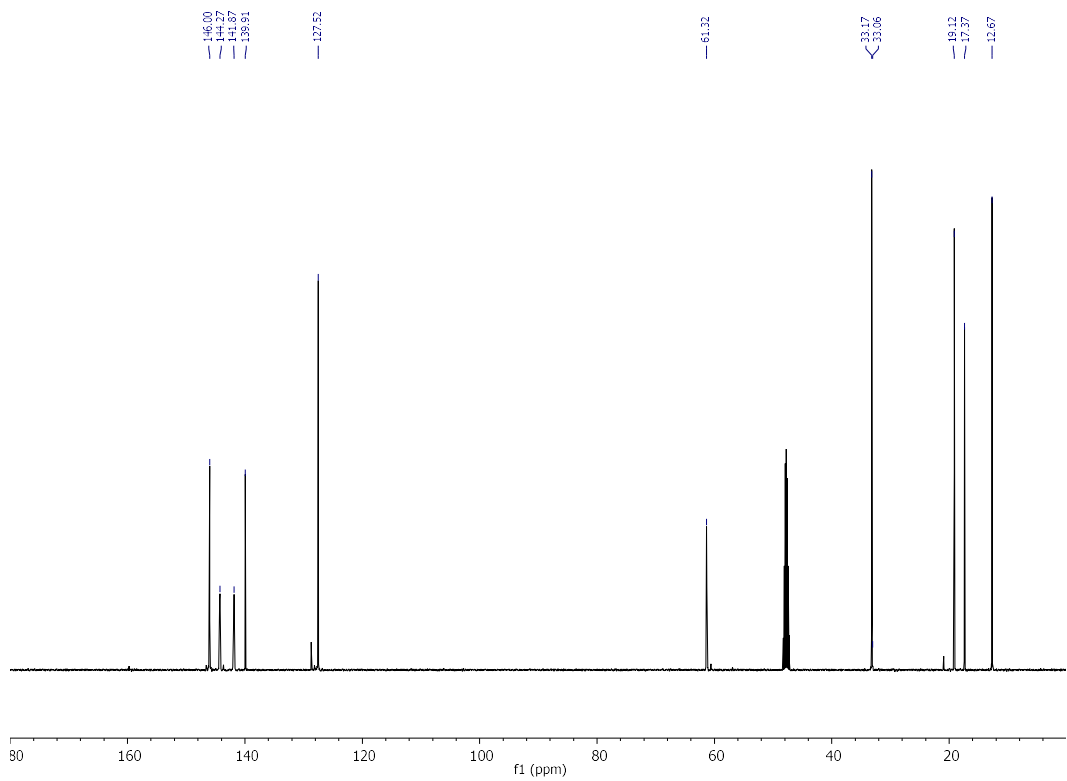

Fig. S13. <sup>13</sup>C NMR spectrum of [BMP][Cl] in CD<sub>3</sub>OD. T = 298.1K

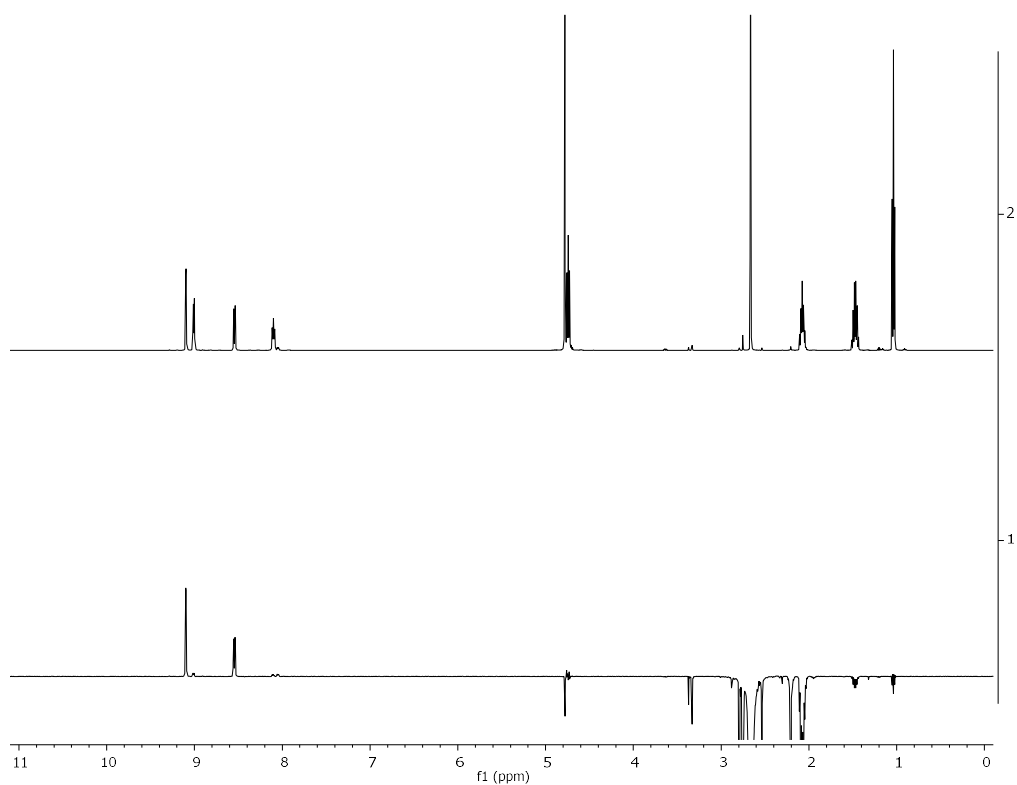

Fig. S14. Top:  $^1\text{H}$  NMR spectrum of [BMP][Cl] in  $\text{CD}_3\text{OD}$ . Bottom:  $^1\text{H}$  NOESY spectrum of the same sample, with selective inversion of the pyridinium  $\text{CH}_3$  resonance (see text).  $T = 298.1\text{K}$

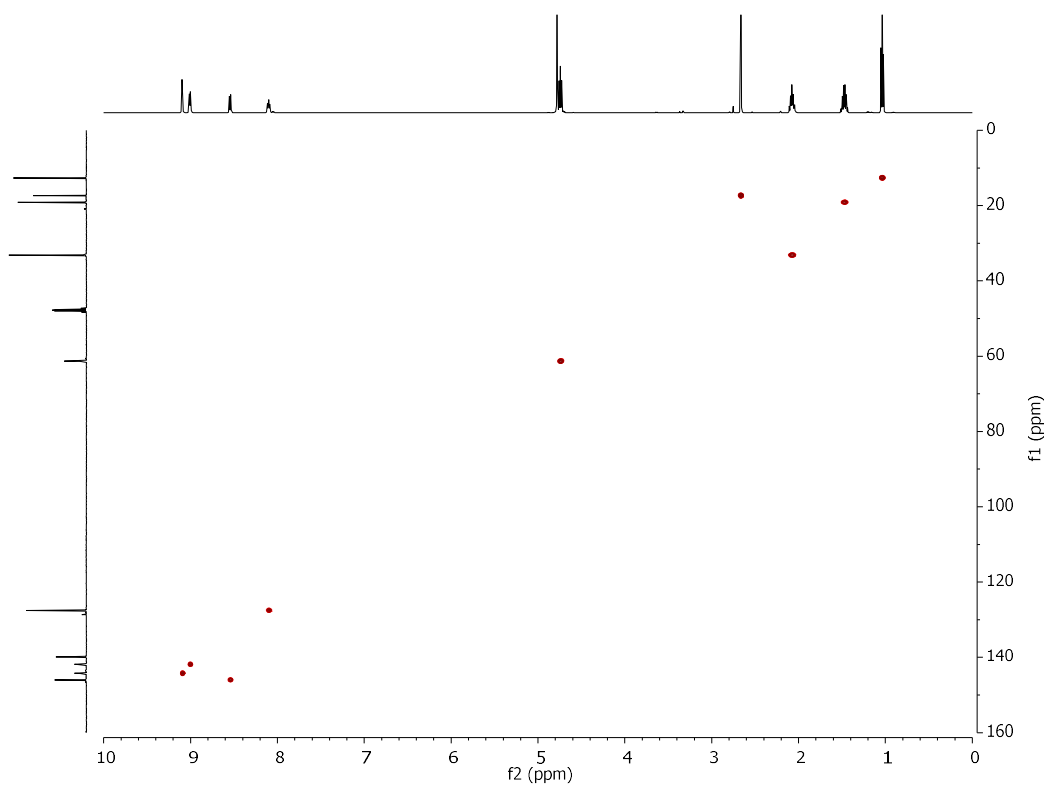

Fig. S15.  $^1\text{H}$ - $^{13}\text{C}$  HSQC spectrum of [BMP][Cl] in  $\text{CD}_3\text{OD}$ .  $T = 298.1\text{K}$

# Synthesis and characterization

## 1. 1-Butyl-3-methylpyridinium bromide [BMPy]Br:

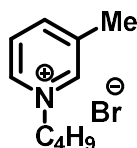

To a stirred solution of 3-picoline (10.0 g, 0.1 mol) and *n*-butylbromide (17.65g, 0.128 mol) was heated and refluxed at 90 °C for 4 h. After completion of the reaction (monitored by TLC), excess *n*-butylbromide was distilled off at 80 °C under reduced pressure (10 mm Hg) over 4 h leaving behind the product [BMPy]Br as a brownish viscous liquid (24.06 g; 97 %).

**Molecular formula :** C<sub>10</sub>H<sub>16</sub>BrN

**Nature :** Brownish viscous liquid

**<sup>1</sup>H NMR (CDCl<sub>3</sub>, 200 MHz) :** d 0.94 (t, *J* = 7.20 Hz, 3H), 1.34-1.45 (m, 2H), 1.96-2.04 (m, 2H), 2.63 (s, 3H), 4.94 (t, *J* = 7.45 Hz, 2H), 8.00 (t, *J* = 6.57 Hz, 1H), 8.20 (d, *J* = 8.09 Hz, 1H), 9.31 (d, *J* = 5.81 Hz, 1H), 9.38 (s, 1H) ppm.

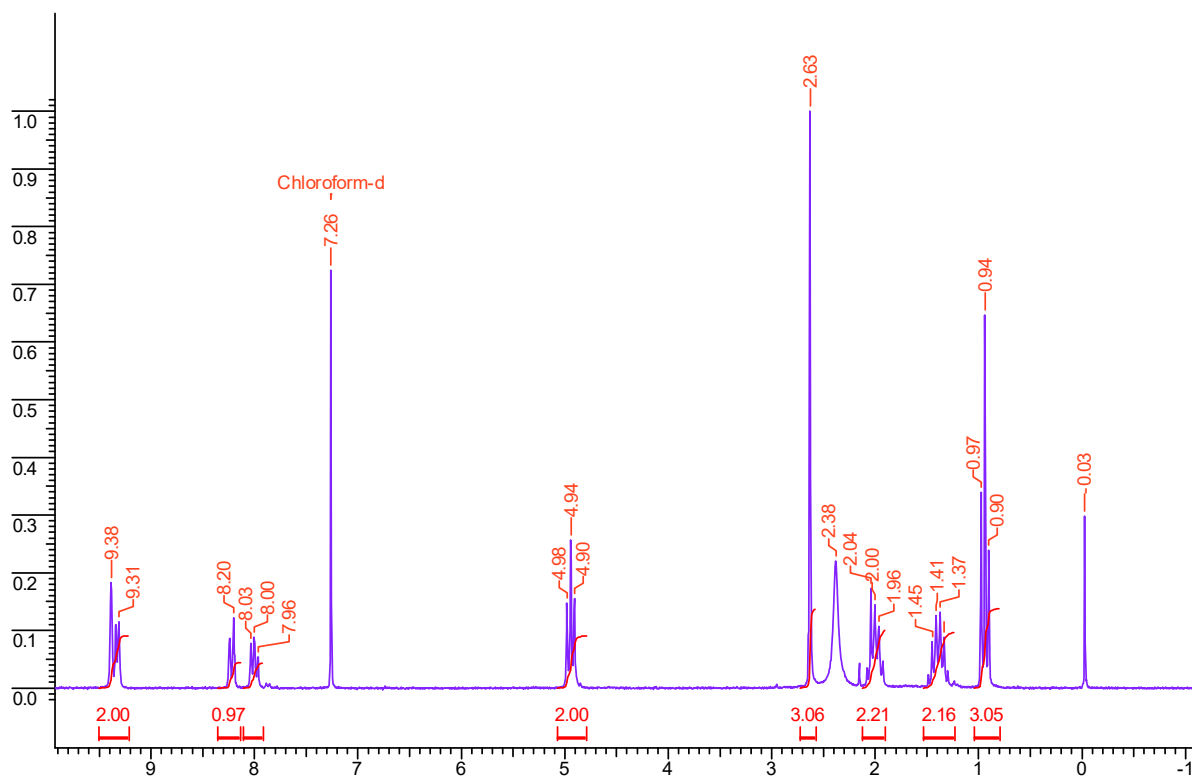

Fig. S16. <sup>1</sup>H-NMR of 1-Butyl-3-methylpyridinium bromide

## 2 1-Butyl-3-methylpyridinium chloride [BMPy]Cl:

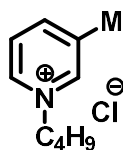

To a stirred solution of 3-picoline (10.0 g, 0.1 mol) and *n*-butylchloride(11.85 g, 0.128 mol) was heated and refluxed at 90 °C for 24 h. After completion of the reaction (monitored by TLC), excess *n*-butylchloride was distilled off at 80 °C under reduced pressure (10 mm Hg) over 4 h leaving behind the product [BMPy]Cl as a brownish viscous liquid (18.94 g; 93 %).

**Molecular formula :** C<sub>10</sub>H<sub>16</sub>ClN

**Nature :** Brownish viscous liquid

**<sup>1</sup>H NMR (CDCl<sub>3</sub>, 200 MHz) :** d 0.94 (t, *J* = 7.20 Hz, 3H), 1.34-1.45 (m, 2H), 1.96-2.04 (m, 2H), 2.63 (s, 3H), 4.94 (t, *J* = 7.45 Hz, 2H), 8.00 (t, *J* = 6.57 Hz, 1H), 8.20 (d, *J* = 8.09 Hz, 1H), 9.31 (d, *J* = 5.81 Hz, 1H), 9.38 (s, 1H) ppm.

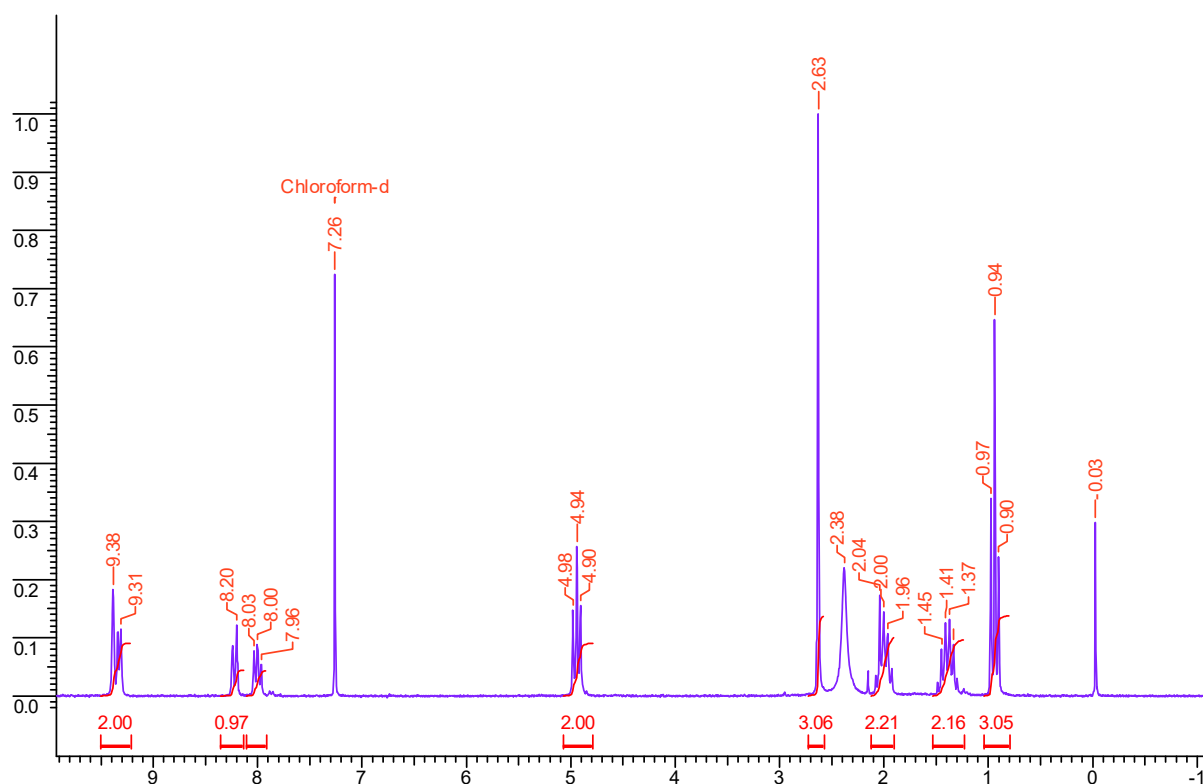

Fig. S17. <sup>1</sup>H NMR of 1-Butyl-3-methylpyridinium chloride

### (3) 1-Butyl-3-methylpyridinium iodide [BMPy]I:

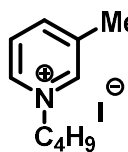

To a stirred solution of 3-picoline (10.0 g, 0.1 mol) and *n*-butyliodide (23.7 g, 0.107 mol) was heated at 90 °C for 24 h. After completion of the reaction (monitored by TLC), excess *n*-butyliodide was distilled off at 80 °C under reduced pressure (10 mm Hg) over 4 h leaving behind the product [BMPy]Cl as a dark reddish viscous liquid (27 g; 93 %).

**Molecular formula :** C<sub>10</sub>H<sub>16</sub>IN

**Nature :** Dark Reddish viscous liquid

**<sup>1</sup>H NMR (CDCl<sub>3</sub>, 200 MHz) :** d 0.94 (t, *J* = 7.20 Hz, 3H), 1.34-1.42 (m, 2H), 1.96-2.04 (m, 2H), 2.63 (s, 3H), 4.96 (t, *J* = 7.45 Hz, 2H), 8.00 (t, *J* = 6.57 Hz, 1H), 8.26 (d, *J* = 8.09 Hz, 1H), 9.12 (d, *J* = 5.81 Hz, 1H), 9.32 (s, 1H) ppm.

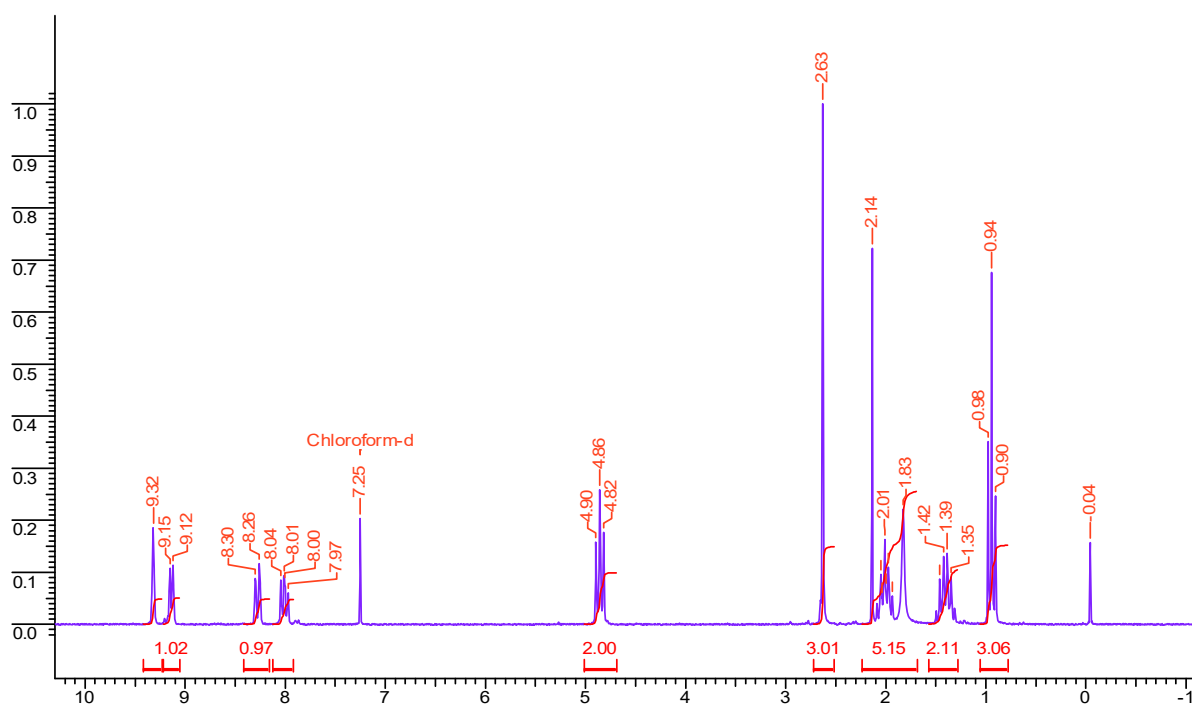

Fig. S18. <sup>1</sup>H NMR of 1-Butyl-3-methylpyridinium iodide

#### 4. 1-Butyl-3-methylpyridinium tribromide

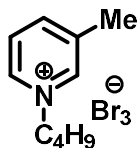

Molecular bromine (1.043 g, 0.652 mmol) was added slowly to 1-butyl-3-methylpyridinium bromide [BMPy]Br (1.0 g, 0.434 mmol) at ice-cooled temperature under stirring to give a deep red liquid. The stirring was continued for another 2 h.

The excess bromine was removed under reduced pressure over 5 h at 60 °C gave pure [BMPy]Br<sub>3</sub> as a red oil (1.62 g; 95%).

**Molecular formula :** C<sub>10</sub>H<sub>16</sub>Br<sub>3</sub>N

**Nature:** Red oil

**<sup>1</sup>H NMR (CDCl<sub>3</sub>, 200 MHz) :** δ 0.96 (t, *J* = 7.20 Hz, 3H), 1.37-1.45 (m, 2H), 1.8-2.05 (m, 2H), 2.65 (s, 3H), 4.88 (t, *J* = 7.58 Hz, 2H), 8.01 (t, *J* = 7.83 Hz, 1H), 8.26 (d, *J* = 8.09 Hz, 1H), 9.14 (d, *J* = 6.07 Hz, 1H), 9.25 (s, 1H) ppm.

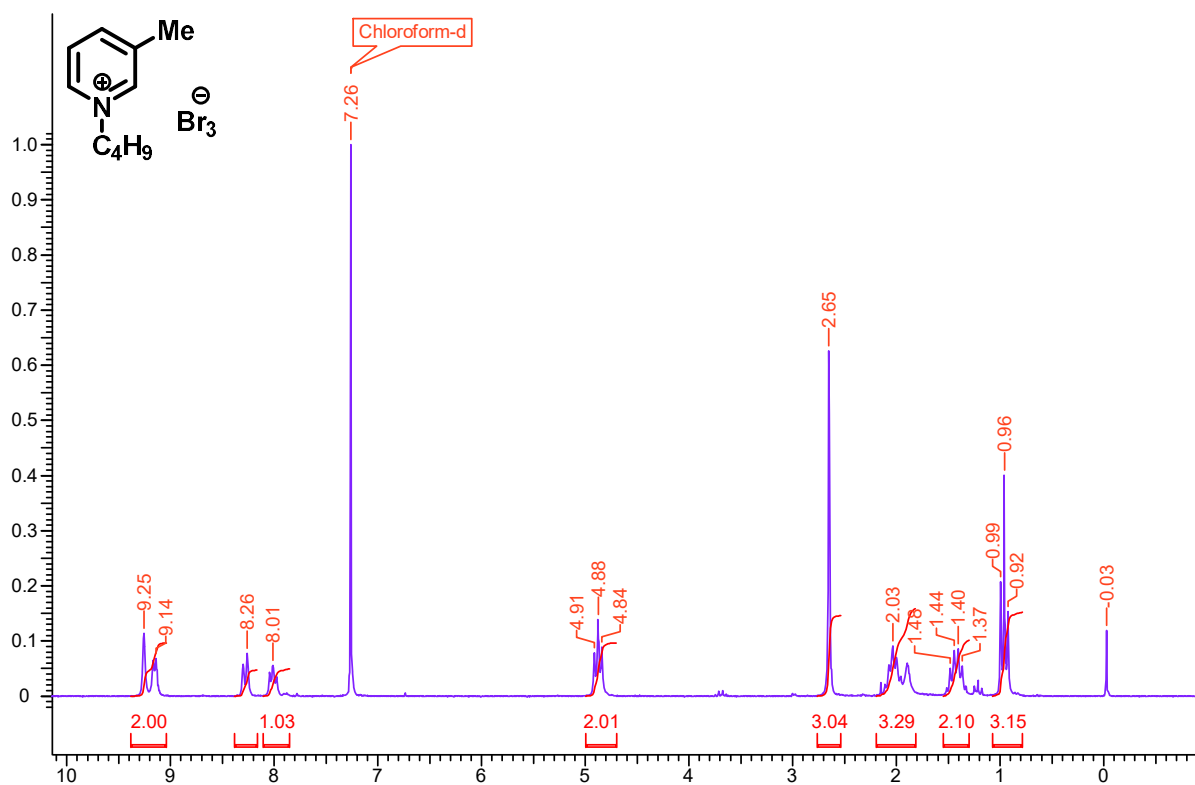

Fig. S19. <sup>1</sup>H NMR of 1-Butyl-3-methylpyridinium tribromide

## 5. 1-Butyl-3-methylpyridinium triiodidide

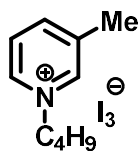

Molecular iodine (13.75 g, 0.108 mol) was added slowly to 1-butyl-3-methylpyridinium iodide [BMPy]I (10 g, 0.0361 mol) in 50ml chloroform, at ice-cooled temperature under stirring for 5 h. It was then left to attain room temperature

and left overnight at room temperature. The excess iodine was removed under reduced pressure over 5 h at 60 °C to afford crude product. This was pet ether (5 x 25 nl) to afford pure [BMPy]I<sub>3</sub> as a dark red oil (18 g; 94%).

**Molecular formula :** C<sub>10</sub>H<sub>16</sub>I<sub>3</sub>N

**Nature:** Dark red oil

**<sup>1</sup>H NMR (CDCl<sub>3</sub>, 200 MHz) :** δ 1.06 (t, *J* = 7.20 Hz, 3H), 1.42-1.61 (m, 2H), 2.04-2.2 (m, 2H), 2.74 (s, 3H), 4.71 (t, *J* = 7.58 Hz, 2H), 8.0 (t, *J* = 7.83 Hz, 1H), 8.36 (d, *J* = 8.09 Hz, 1H), 8.61 (d, 2H) ppm.

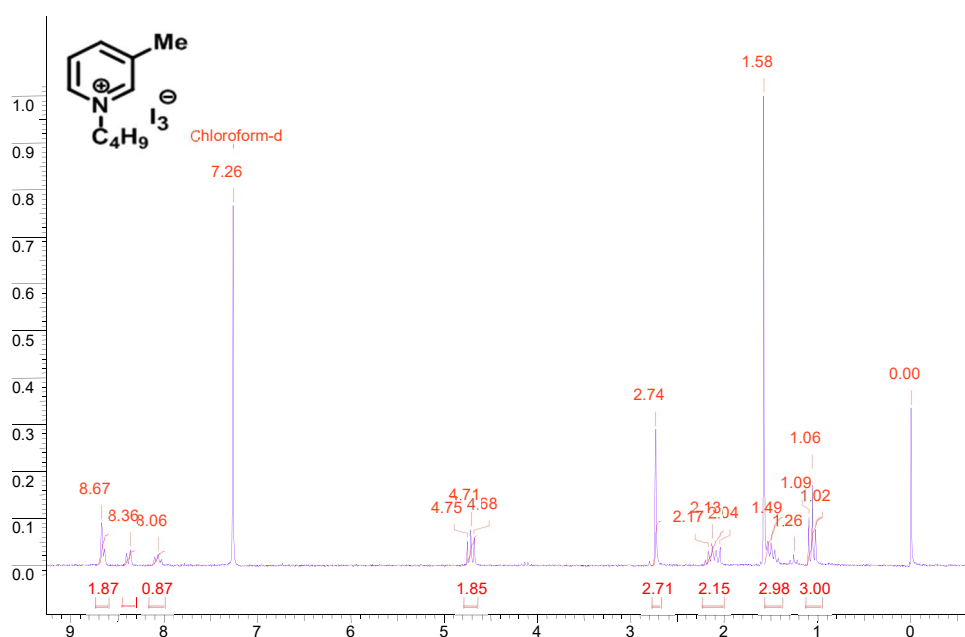

Fig. S20. <sup>1</sup>H NMR of 1-Butyl-3-methylpyridinium triiodide

## 6. 1-butyl-3-methylpyridinium dichloroiodate

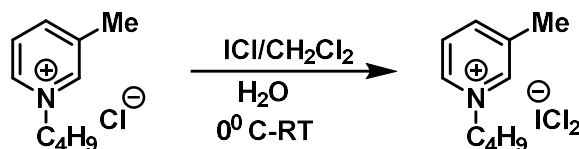

A black solution of ICl (3.14 g, 19.39 mmol) in dichloromethane (35 ml), was added drop wise to an ice cold solution of 1-butyl-3-methylpyridinium chloride<sup>1</sup> (3.0 g, 16.16 mmol) in water (16 ml) under stirring and then left to attain room temperature. After the reaction mixture was stirred for 1 hour at room temperature, the dichloromethane layer was separated and dried with sodium sulphate and then evaporated under vacuum to afford water soluble dark reddish brown ionic liquid 1-butyl-3-methylpyridinium dichloroiodate (BMPDCI) in quantitative yields (5.5 g, 98%). This ionic liquid was stable and stored in dark at 10 °C (in refrigerator) for several months without any change in colour, loss of reactivity and degradation (checked by <sup>1</sup>H NMR).

**<sup>1</sup>H NMR** (200 MHz, DMSO-*d*<sub>6</sub> δ/ppm): 8.87 (s, 1H, Ar-H), 8.80 (d, 1H, *J* = 5.94 Hz, Ar-H), 8.35 (d, 1H, *J* = 7.96 Hz, Ar-H), 7.97 (dd, 1H, *J* = 8.42, 1.37 Hz, Ar-H), 4.43 (t, 2H, CH<sub>2</sub>), 2.40 (s, 3H, Ar-CH<sub>3</sub>), 1.87 – 1.72 (m, 2H, -CH<sub>2</sub>-CH<sub>2</sub>), 1.28 - 1.09 (m, 2H, CH<sub>2</sub>-CH<sub>3</sub>), 0.81 (t, 3H, CH<sub>3</sub>); **<sup>13</sup>C NMR** (50 MHz, CDCl<sub>3</sub>+DMSO-*d*<sub>6</sub>): 12.51, 17.77, 18.41, 32.44, 60.83, 126.96, 138.99, 140.84, 143.18, 145.15; **IR** (thin film, cm<sup>-1</sup>): 3058, 2962, 2933, 2873, 1633, 1504, 1465, 1382, 1325, 1251, 1201, 1157, 804, 752, 684; **Viscosity** 43.6 cP at 25 °C. (Revolutions per minute (RPM): 550, Full Scale Range (FSR): 12.8%, Shear rate: 3197); **HRMS-ESI** Positive mode: [M<sup>+</sup>-ICl<sub>2</sub>]<sup>+</sup> calcd for C<sub>10</sub>H<sub>16</sub>N [M-ICl<sub>2</sub>]<sup>+</sup> 150.1282, found 150.1276.



AD-21#561 RT: 2.50 AV:1 NL: 4.52E9  
T: FTMS + p ESI Full ms [60.00-900.00]

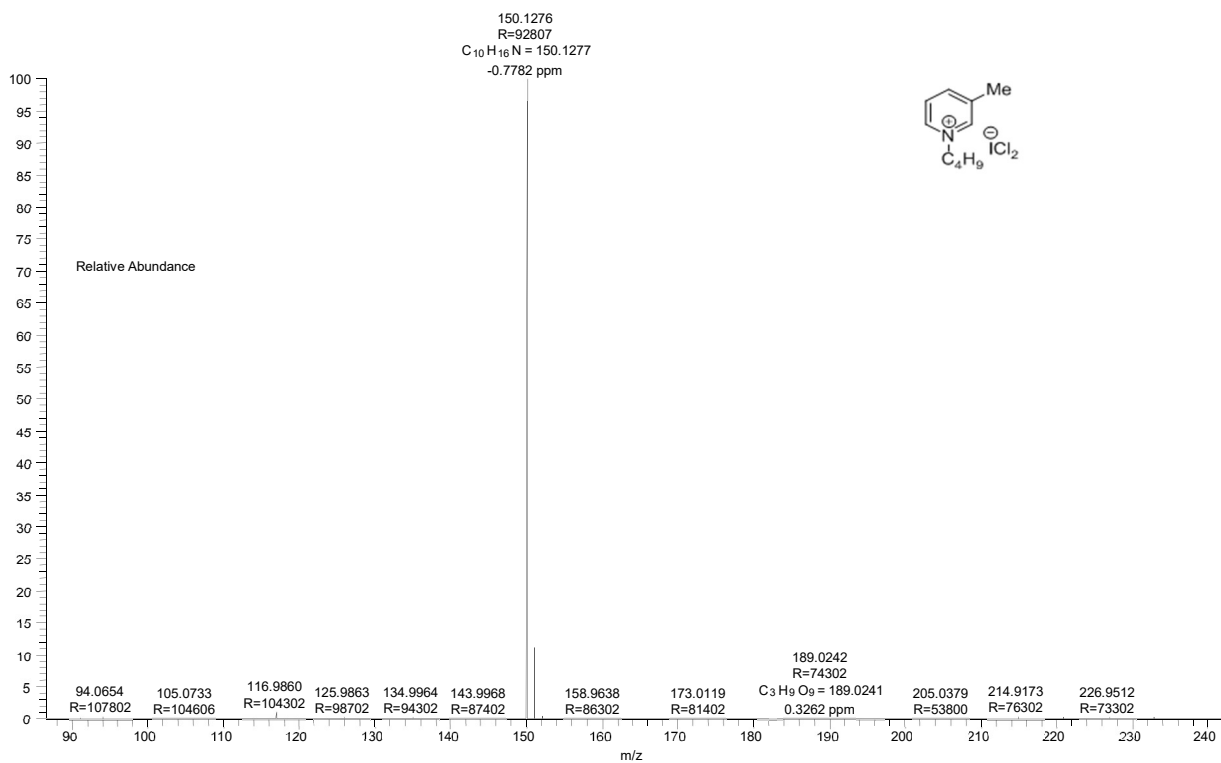

Fig. S21. HRMS of 1-butyl-3-methylpyridinium dichloroiodate

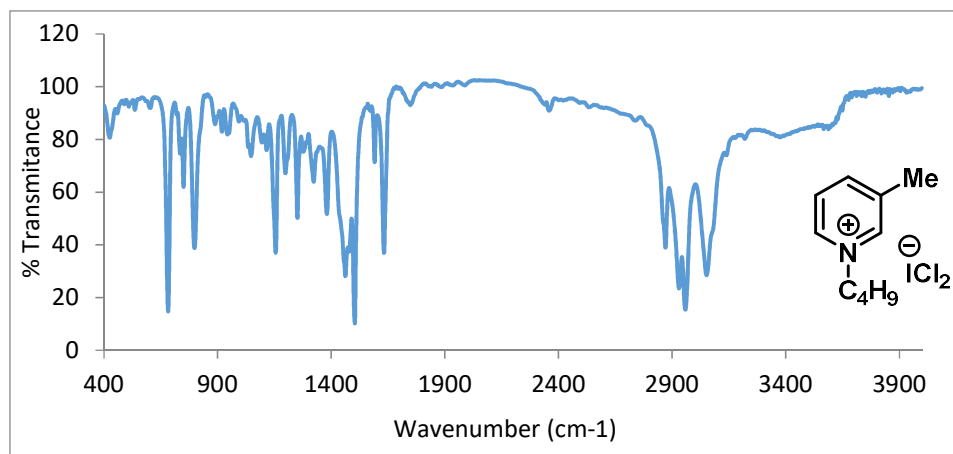

Fig. S22. IR of 1-butyl-3-methylpyridinium dichloroiodate

| Acquisition Time (sec) | Comment | Date                  | Frequency (MHz) |
|------------------------|---------|-----------------------|-----------------|
| 7.9167                 | amar    | 27/05/2014 03:55:36   | 200.13          |
| Nucleus                | 1H      | Original Points Count | Points Count    |
|                        |         | 32768                 | 32768           |
| Temperature (grad C)   | 0.000   | Sweep Width (Hz)      | 4139.07         |

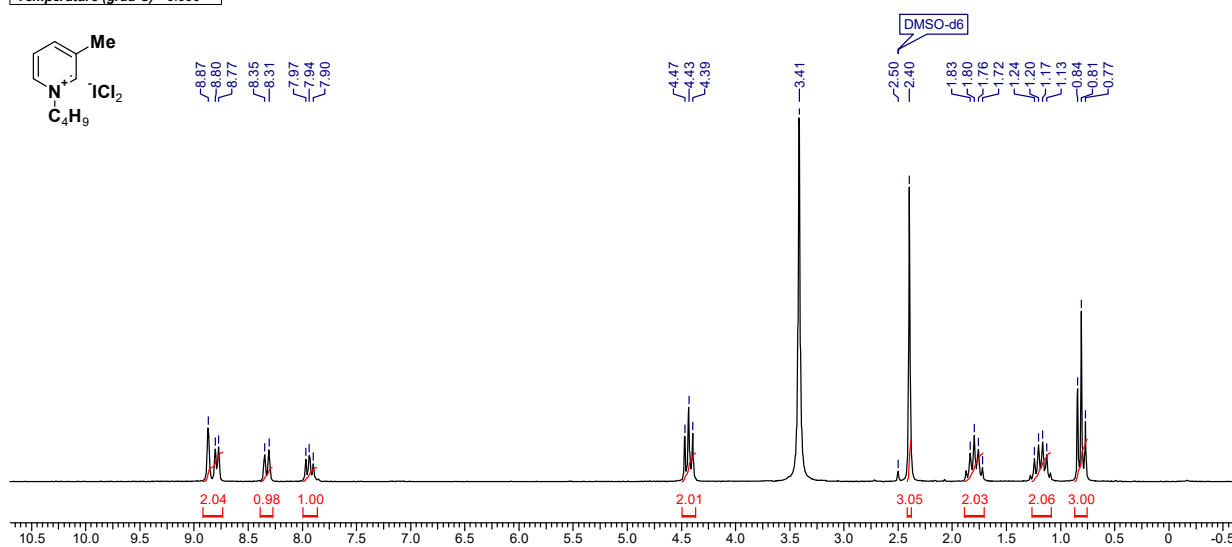Fig. S23.  $^1\text{H}$  NMR of 1-butyl-3-methylpyridinium dichloroiodate

| Acquisition Time (sec) | Comment         | Date                  | Frequency (MHz) |
|------------------------|-----------------|-----------------------|-----------------|
| 2.7329                 | amar            | 27/05/2014 06:17:24   | 50.32           |
| Nucleus                | $^{13}\text{C}$ | Original Points Count | Points Count    |
|                        |                 | 32768                 | 32768           |
| Temperature (grad C)   | 0.000           | Sweep Width (Hz)      | 11990.41        |

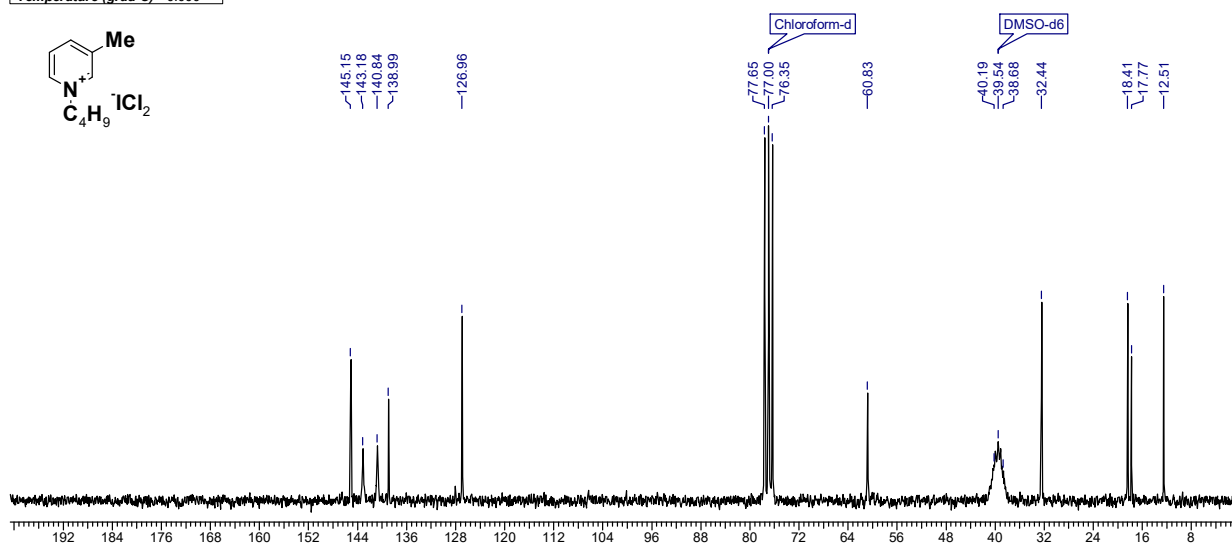Fig. S24.  $^{13}\text{C}$  NMR of 1-butyl-3-methylpyridinium dichloroiodate

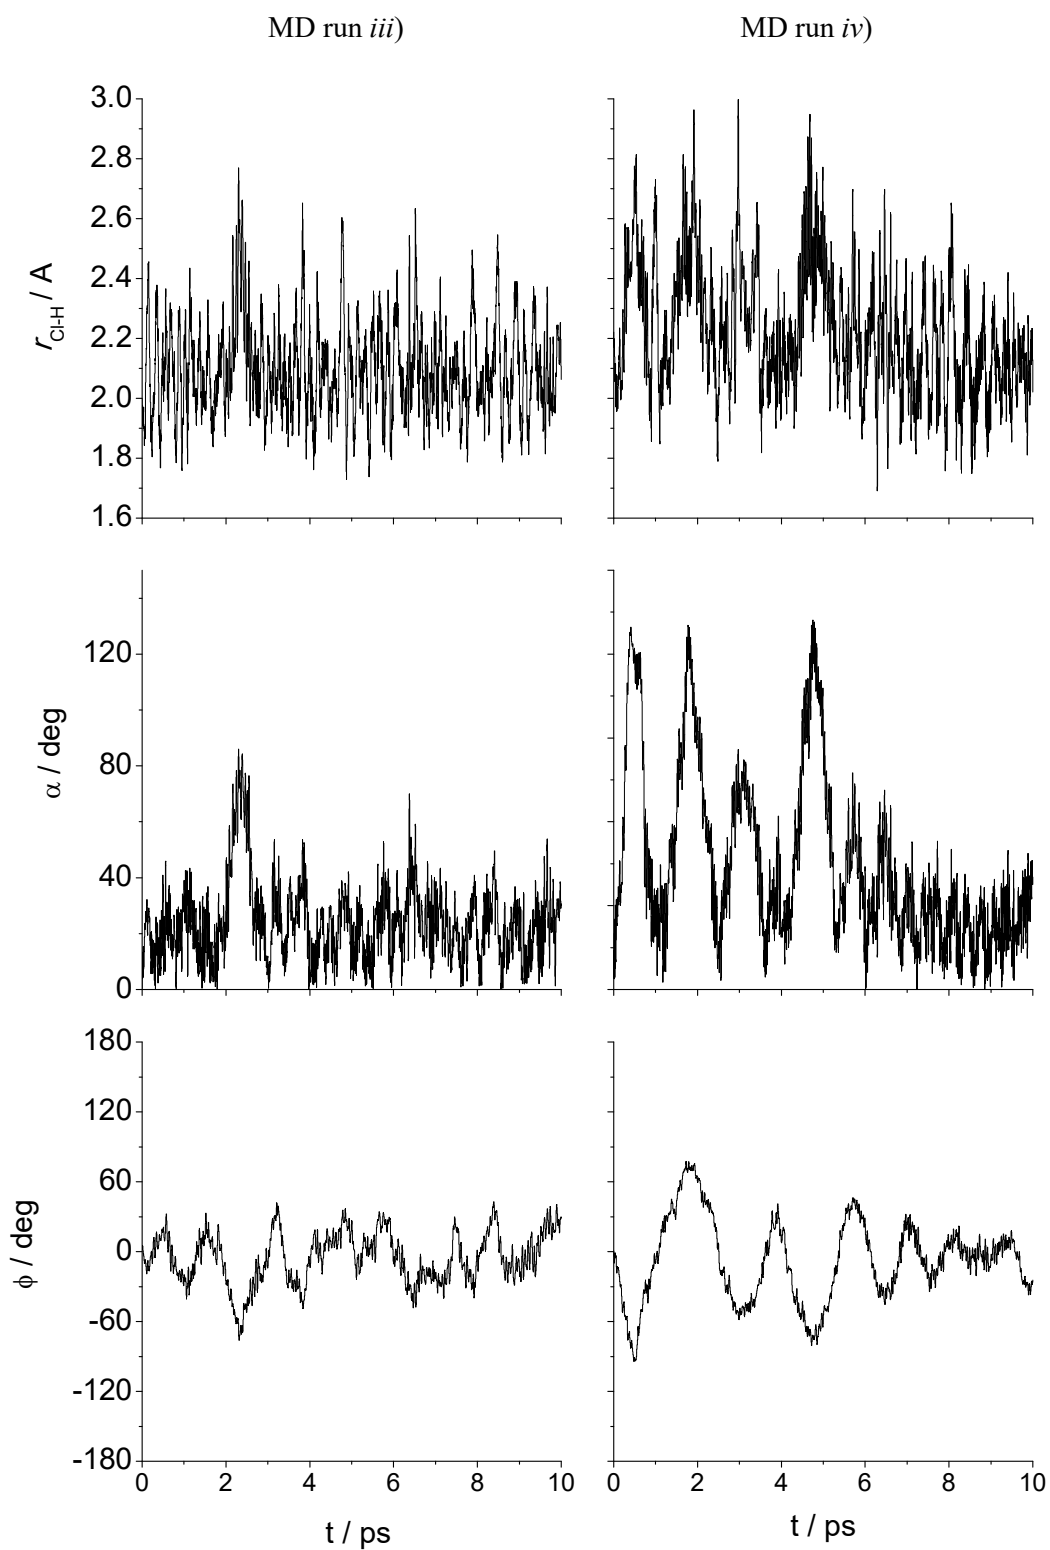

Fig. S25. Time evolution of (top): H-bond distance,  $r(\text{Cl-H})$  between Chloride and the H2, in MD run *iii*), or H6, in MD run *iv*) hydrogen; (middle) angle  $\alpha$  between the Cl-H2/6-C2/6 atoms; (bottom): out-of-plane bending angle  $\phi$  of the chloride anion with respect to the aromatic ring (dihedral angle Cl-H2/6-C2/6-C8)

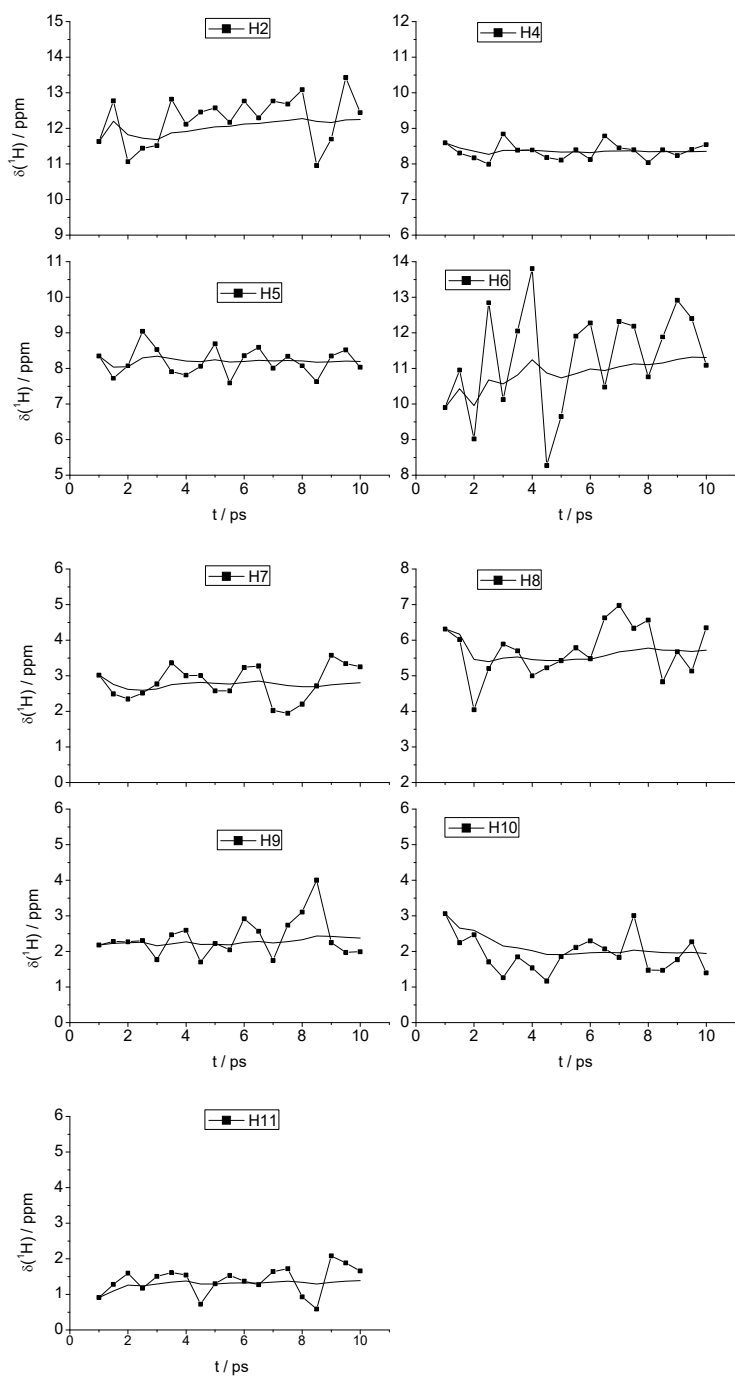

Fig. S26. Time evolution of the BMP protons during the 10 ps ADMP dynamics. Values are averaged of the MD run *iii*) and MD run *iv*). Symbols: instantaneous values; line: running average.

With reference to Figure 5 of the manuscript.

BMP, *o*)

27

|   |           |           |           |
|---|-----------|-----------|-----------|
| C | -0.088896 | 0.069042  | 0.104997  |
| C | -0.162918 | -0.128677 | 1.474422  |
| C | 1.001572  | -0.219039 | 2.205090  |
| N | 2.191576  | -0.117197 | 1.592462  |
| C | 2.277806  | 0.077080  | 0.262987  |
| C | 1.150431  | 0.175884  | -0.529130 |
| H | -1.113396 | -0.216844 | 1.981246  |
| H | 1.019044  | -0.373007 | 3.274826  |
| C | 3.431965  | -0.153564 | 2.402598  |
| H | 3.278566  | 0.146977  | -0.141539 |
| C | 1.263843  | 0.391937  | -2.009123 |
| H | -0.998247 | 0.140253  | -0.480273 |
| H | 4.211098  | -0.596033 | 1.782309  |
| C | 3.822261  | 1.239368  | 2.879057  |
| H | 3.247773  | -0.824909 | 3.241007  |
| C | 5.088908  | 1.197377  | 3.731593  |
| H | 3.978373  | 1.888386  | 2.010904  |
| H | 2.998209  | 1.668447  | 3.458888  |
| C | 5.498653  | 2.582147  | 4.223483  |
| H | 4.924751  | 0.535724  | 4.588932  |
| H | 5.903538  | 0.756377  | 3.147300  |
| H | 6.405532  | 2.529295  | 4.830011  |
| H | 5.695056  | 3.254344  | 3.383256  |
| H | 4.709820  | 3.030080  | 4.834453  |
| H | 0.711339  | -0.379807 | -2.548304 |
| H | 0.835682  | 1.359700  | -2.279767 |
| H | 2.302192  | 0.370129  | -2.338968 |

BMP Cl, *i*)

28

|   |           |           |           |
|---|-----------|-----------|-----------|
| C | -0.241796 | -0.344581 | 0.415827  |
| C | -0.126594 | -0.788831 | 1.723142  |
| C | 1.094938  | -0.713004 | 2.354414  |
| N | 2.161631  | -0.224931 | 1.702026  |
| C | 2.058442  | 0.224644  | 0.438837  |
| C | 0.862633  | 0.185579  | -0.249944 |
| H | -0.973907 | -1.193842 | 2.257811  |
| H | 1.257025  | -1.040251 | 3.371347  |
| C | 3.468377  | -0.130465 | 2.393704  |
| H | 2.966879  | 0.613318  | -0.001534 |
| C | 0.762084  | 0.727902  | -1.643946 |
| H | -1.197115 | -0.402274 | -0.092434 |
| H | 4.235887  | -0.410285 | 1.671181  |
| C | 3.711266  | 1.265165  | 2.951132  |

|    |          |           |           |
|----|----------|-----------|-----------|
| H  | 3.466327 | -0.878749 | 3.185879  |
| C  | 5.051561 | 1.345368  | 3.678901  |
| H  | 3.687453 | 1.993171  | 2.134002  |
| H  | 2.896697 | 1.529075  | 3.633270  |
| C  | 5.321250 | 2.742857  | 4.228612  |
| H  | 5.064173 | 0.617338  | 4.497395  |
| H  | 5.855488 | 1.057674  | 2.992288  |
| H  | 6.281063 | 2.783749  | 4.748468  |
| H  | 5.342051 | 3.481961  | 3.422801  |
| H  | 4.541474 | 3.041280  | 4.935142  |
| H  | 0.193656 | 0.049719  | -2.282347 |
| H  | 0.242125 | 1.689087  | -1.624843 |
| H  | 1.746423 | 0.881690  | -2.086129 |
| Cl | 0.425917 | 3.310808  | 1.654491  |

BMP Cl, *ii*)

28

|    |           |           |           |
|----|-----------|-----------|-----------|
| C  | 2.205605  | 0.169287  | 0.061256  |
| C  | 1.117573  | 0.312555  | -0.778622 |
| C  | -0.148525 | 0.157562  | -0.215714 |
| C  | -0.286918 | -0.128711 | 1.133572  |
| C  | 0.841456  | -0.258849 | 1.911678  |
| N  | 2.057215  | -0.106085 | 1.366997  |
| C  | 1.309677  | 0.581497  | -2.242051 |
| C  | 3.257382  | -0.242257 | 2.219850  |
| C  | 3.637419  | 1.083786  | 2.864619  |
| C  | 4.879101  | 0.936615  | 3.741734  |
| C  | 5.269471  | 2.248828  | 4.414804  |
| Cl | 2.465356  | -3.321972 | 0.413373  |
| H  | -1.259497 | -0.257395 | 1.586923  |
| H  | 0.809721  | -0.487451 | 2.967395  |
| H  | 3.223575  | 0.263984  | -0.291176 |
| H  | -1.028596 | 0.256363  | -0.840354 |
| H  | 4.054917  | -0.629665 | 1.587005  |
| H  | 3.033208  | -1.002746 | 2.967470  |
| H  | 3.820337  | 1.829360  | 2.083308  |
| H  | 2.798196  | 1.447044  | 3.467639  |
| H  | 4.693801  | 0.171876  | 4.503836  |
| H  | 5.711379  | 0.572883  | 3.129606  |
| H  | 6.159911  | 2.123259  | 5.034832  |
| H  | 5.483760  | 3.022021  | 3.671186  |
| H  | 4.462418  | 2.614759  | 5.056194  |
| H  | 0.581378  | 1.310932  | -2.599302 |
| H  | 2.311603  | 0.956689  | -2.451178 |
| H  | 1.167314  | -0.341804 | -2.809376 |

BMP Cl, iii)  
28

|    |           |           |           |
|----|-----------|-----------|-----------|
| C  | 0.586466  | 0.374121  | -0.214664 |
| C  | -0.284980 | -0.538471 | 0.379454  |
| C  | 0.114217  | -1.271460 | 1.487249  |
| C  | 1.381232  | -1.086921 | 1.994506  |
| N  | 2.215925  | -0.207758 | 1.417304  |
| C  | 1.843693  | 0.515031  | 0.344676  |
| C  | 3.557320  | 0.028692  | 2.000650  |
| C  | 3.524840  | 1.170602  | 3.006832  |
| C  | 4.912673  | 1.434293  | 3.586263  |
| C  | 4.912720  | 2.591590  | 4.580136  |
| C  | 0.198453  | 1.174703  | -1.423363 |
| Cl | 4.563713  | 2.560729  | -0.547128 |
| H  | -0.545795 | -1.984355 | 1.960934  |
| H  | 1.758739  | -1.623314 | 2.853690  |
| H  | 2.593149  | 1.204479  | -0.042137 |
| H  | -1.280098 | -0.674903 | -0.027973 |
| H  | 4.226939  | 0.266476  | 1.173873  |
| H  | 3.879959  | -0.905690 | 2.460155  |
| H  | 3.159048  | 2.072632  | 2.504969  |
| H  | 2.820643  | 0.932626  | 3.811758  |
| H  | 5.281358  | 0.526142  | 4.075992  |
| H  | 5.604304  | 1.652676  | 2.765625  |
| H  | 5.914941  | 2.769505  | 4.976653  |
| H  | 4.571488  | 3.515123  | 4.103448  |
| H  | 4.248400  | 2.384561  | 5.424433  |
| H  | -0.762734 | 1.666747  | -1.263967 |
| H  | 0.947000  | 1.933956  | -1.650006 |
| H  | 0.099115  | 0.519736  | -2.292252 |

BMP Cl, iv)  
28

|   |           |           |           |
|---|-----------|-----------|-----------|
| C | 0.645579  | 0.377212  | -0.255787 |
| C | -0.253477 | -0.473784 | 0.391635  |
| C | 0.121713  | -1.146429 | 1.542386  |
| C | 1.392564  | -0.968305 | 2.048966  |
| N | 2.251866  | -0.150618 | 1.420091  |
| C | 1.901620  | 0.512068  | 0.301154  |
| C | 3.590467  | 0.075504  | 2.014517  |
| C | 3.547415  | 1.195017  | 3.045926  |
| C | 4.927311  | 1.439839  | 3.652274  |
| C | 4.901769  | 2.525810  | 4.723565  |
| C | 0.270226  | 1.116096  | -1.506915 |
| H | -0.561049 | -1.809089 | 2.055322  |
| H | 1.765737  | -1.458060 | 2.946398  |
| H | 2.661462  | 1.150157  | -0.130203 |
| H | -1.250437 | -0.606885 | -0.012456 |

|    |           |           |           |
|----|-----------|-----------|-----------|
| H  | 4.273375  | 0.307003  | 1.197161  |
| H  | 3.896722  | -0.861997 | 2.479393  |
| H  | 3.174969  | 2.112942  | 2.577928  |
| H  | 2.841563  | 0.917301  | 3.835994  |
| H  | 5.299369  | 0.504910  | 4.084674  |
| H  | 5.627921  | 1.720249  | 2.858000  |
| H  | 5.898904  | 2.691537  | 5.137891  |
| H  | 4.546504  | 3.475577  | 4.312877  |
| H  | 4.237637  | 2.245476  | 5.546134  |
| H  | -0.612823 | 1.733988  | -1.331845 |
| H  | 1.080399  | 1.759052  | -1.850350 |
| H  | 0.029163  | 0.409715  | -2.304404 |
| Cl | 3.125296  | -2.364234 | 4.778777  |

BMP Cl, v)  
29

|    |           |           |           |
|----|-----------|-----------|-----------|
| C  | 0.593985  | 0.375186  | -0.217621 |
| C  | -0.280885 | -0.527123 | 0.389629  |
| C  | 0.116161  | -1.245392 | 1.506608  |
| C  | 1.385292  | -1.062151 | 2.014216  |
| N  | 2.220301  | -0.194789 | 1.419612  |
| C  | 1.851753  | 0.516339  | 0.337223  |
| C  | 3.560333  | 0.040398  | 2.006078  |
| C  | 3.523405  | 1.205284  | 2.984806  |
| C  | 4.897436  | 1.452365  | 3.601260  |
| C  | 4.892086  | 2.630124  | 4.570978  |
| C  | 0.200990  | 1.169587  | -1.429377 |
| Cl | 4.545705  | 2.590133  | -0.622020 |
| H  | -0.547987 | -1.948932 | 1.988915  |
| H  | 1.775188  | -1.583189 | 2.885692  |
| H  | 2.603651  | 1.197396  | -0.058562 |
| H  | -1.276494 | -0.665551 | -0.016358 |
| H  | 4.241653  | 0.247798  | 1.180481  |
| H  | 3.857241  | -0.880399 | 2.508944  |
| H  | 3.186400  | 2.104457  | 2.457260  |
| H  | 2.793809  | 0.989411  | 3.773607  |
| H  | 5.226508  | 0.546122  | 4.121747  |
| H  | 5.622505  | 1.637564  | 2.800821  |
| H  | 5.883232  | 2.789948  | 5.001724  |
| H  | 4.593207  | 3.551888  | 4.062999  |
| H  | 4.191092  | 2.457169  | 5.392927  |
| H  | -0.672013 | 1.788734  | -1.211379 |
| H  | 1.012388  | 1.819712  | -1.757182 |
| H  | -0.062137 | 0.501310  | -2.252256 |
| Cl | 3.169373  | -2.486054 | 4.741637  |

BMP Br, *i*)  
28

|    |           |           |           |
|----|-----------|-----------|-----------|
| C  | -0.252483 | -0.351694 | 0.477870  |
| C  | -0.089396 | -0.753968 | 1.796008  |
| C  | 1.157348  | -0.680548 | 2.372429  |
| N  | 2.204057  | -0.229591 | 1.659732  |
| C  | 2.054819  | 0.181140  | 0.390217  |
| C  | 0.829697  | 0.135791  | -0.249830 |
| H  | -0.919787 | -1.126245 | 2.379231  |
| H  | 1.358569  | -0.980410 | 3.390973  |
| C  | 3.529641  | -0.115326 | 2.310376  |
| H  | 2.947622  | 0.547387  | -0.097881 |
| C  | 0.684561  | 0.646024  | -1.651257 |
| H  | -1.229619 | -0.407809 | 0.012752  |
| H  | 4.282269  | -0.238147 | 1.531463  |
| C  | 3.681859  | 1.221879  | 3.021960  |
| H  | 3.623608  | -0.952524 | 3.002493  |
| C  | 5.064942  | 1.364429  | 3.652100  |
| H  | 3.501543  | 2.030703  | 2.307156  |
| H  | 2.908714  | 1.309675  | 3.793040  |
| C  | 5.235322  | 2.704898  | 4.361152  |
| H  | 5.228992  | 0.546898  | 4.362984  |
| H  | 5.830180  | 1.260326  | 2.874875  |
| H  | 6.229490  | 2.791116  | 4.805595  |
| H  | 5.103606  | 3.535402  | 3.661784  |
| H  | 4.497534  | 2.821209  | 5.160268  |
| H  | -0.063077 | 0.070782  | -2.198401 |
| H  | 0.360644  | 1.690045  | -1.618189 |
| H  | 1.629864  | 0.601179  | -2.192732 |
| Br | 0.988191  | 3.573193  | 1.196070  |

BMP Br, *ii*)  
Not a minimum

BMP Br, *iii*)  
28

|   |           |           |           |
|---|-----------|-----------|-----------|
| C | 0.595476  | 0.362050  | -0.216342 |
| C | -0.266259 | -0.574529 | 0.354760  |
| C | 0.138695  | -1.325279 | 1.448305  |
| C | 1.401646  | -1.136027 | 1.964740  |
| N | 2.226925  | -0.234359 | 1.409734  |
| C | 1.848237  | 0.505539  | 0.351086  |
| C | 3.562021  | 0.013369  | 2.003272  |
| C | 3.509296  | 1.152701  | 3.011499  |
| C | 4.894989  | 1.454973  | 3.576181  |
| C | 4.871021  | 2.618747  | 4.562287  |
| C | 0.201726  | 1.187403  | -1.406307 |

|    |           |           |           |
|----|-----------|-----------|-----------|
| Br | 4.582542  | 2.832515  | -0.436958 |
| H  | -0.514333 | -2.055544 | 1.904921  |
| H  | 1.782618  | -1.685987 | 2.813596  |
| H  | 2.587107  | 1.216310  | -0.015680 |
| H  | -1.258188 | -0.714766 | -0.059207 |
| H  | 4.234333  | 0.263355  | 1.181897  |
| H  | 3.893415  | -0.919117 | 2.460064  |
| H  | 3.118684  | 2.045046  | 2.511475  |
| H  | 2.817888  | 0.896673  | 3.822036  |
| H  | 5.293858  | 0.560253  | 4.066888  |
| H  | 5.569556  | 1.689504  | 2.745932  |
| H  | 5.870936  | 2.828393  | 4.949098  |
| H  | 4.499630  | 3.528147  | 4.081059  |
| H  | 4.219563  | 2.399331  | 5.413482  |
| H  | -0.750031 | 1.690278  | -1.224689 |
| H  | 0.957065  | 1.940736  | -1.630359 |
| H  | 0.079800  | 0.549663  | -2.284995 |

BMP Br, *iv*)  
28

|    |           |           |           |
|----|-----------|-----------|-----------|
| C  | 0.631906  | 0.362146  | -0.259935 |
| C  | -0.249944 | -0.531805 | 0.352491  |
| C  | 0.135585  | -1.235922 | 1.480674  |
| C  | 1.400542  | -1.047803 | 1.998526  |
| N  | 2.244302  | -0.190994 | 1.402240  |
| C  | 1.882942  | 0.503442  | 0.306286  |
| C  | 3.578708  | 0.041694  | 2.003388  |
| C  | 3.536885  | 1.189155  | 3.003146  |
| C  | 4.905090  | 1.412583  | 3.642722  |
| C  | 4.887344  | 2.547014  | 4.662575  |
| C  | 0.246355  | 1.136888  | -1.485844 |
| H  | -0.534135 | -1.931326 | 1.966722  |
| H  | 1.777958  | -1.557640 | 2.881964  |
| H  | 2.631499  | 1.170318  | -0.100794 |
| H  | -1.241419 | -0.673551 | -0.061820 |
| H  | 4.271891  | 0.242621  | 1.186296  |
| H  | 3.871560  | -0.884429 | 2.498953  |
| H  | 3.202167  | 2.104393  | 2.502383  |
| H  | 2.802471  | 0.951825  | 3.780313  |
| H  | 5.225142  | 0.484359  | 4.127609  |
| H  | 5.640708  | 1.630756  | 2.860418  |
| H  | 5.874116  | 2.689002  | 5.109128  |
| H  | 4.590244  | 3.490808  | 4.195746  |
| H  | 4.180726  | 2.334558  | 5.470107  |
| H  | -0.643439 | 1.738668  | -1.289563 |
| H  | 1.048662  | 1.800642  | -1.807517 |
| H  | 0.013231  | 0.454816  | -2.306387 |
| Br | 3.241638  | -2.425534 | 4.905300  |

BMP Br, v)  
29

|    |           |           |           |
|----|-----------|-----------|-----------|
| C  | 0.593956  | 0.365857  | -0.221698 |
| C  | -0.260842 | -0.577206 | 0.351480  |
| C  | 0.148222  | -1.317634 | 1.449270  |
| C  | 1.409195  | -1.117392 | 1.970651  |
| N  | 2.227244  | -0.214987 | 1.405984  |
| C  | 1.845378  | 0.518797  | 0.343606  |
| C  | 3.563086  | 0.030595  | 1.998824  |
| C  | 3.518393  | 1.196101  | 2.976308  |
| C  | 4.888904  | 1.446920  | 3.600195  |
| C  | 4.865777  | 2.611098  | 4.586009  |
| C  | 0.189274  | 1.188651  | -1.410280 |
| Br | 4.511251  | 2.869419  | -0.620860 |
| H  | -0.500329 | -2.050689 | 1.908258  |
| H  | 1.800810  | -1.649770 | 2.834046  |
| H  | 2.580371  | 1.230155  | -0.029096 |
| H  | -1.249770 | -0.729023 | -0.065940 |
| H  | 4.247108  | 0.239352  | 1.175511  |
| H  | 3.864520  | -0.887991 | 2.503233  |
| H  | 3.184339  | 2.094683  | 2.446316  |
| H  | 2.786425  | 0.978259  | 3.761788  |
| H  | 5.225692  | 0.537178  | 4.109433  |
| H  | 5.613634  | 1.651806  | 2.804468  |
| H  | 5.851898  | 2.776452  | 5.026249  |
| H  | 4.559671  | 3.536042  | 4.088485  |
| H  | 4.161541  | 2.419006  | 5.400973  |
| H  | -0.745523 | 1.715788  | -1.208502 |
| H  | 0.954961  | 1.923202  | -1.661114 |
| H  | 0.029164  | 0.546881  | -2.279714 |
| Br | 3.139824  | -2.514206 | 4.938526  |

BMP I, i)  
28

|   |           |           |           |
|---|-----------|-----------|-----------|
| C | -0.239697 | -0.363932 | 0.482515  |
| C | -0.070054 | -0.744686 | 1.805958  |
| C | 1.179558  | -0.662812 | 2.375178  |
| N | 2.223044  | -0.225020 | 1.649731  |
| C | 2.067847  | 0.164781  | 0.374319  |
| C | 0.839221  | 0.110201  | -0.258936 |
| H | -0.897424 | -1.106354 | 2.399858  |
| H | 1.384658  | -0.946604 | 3.397759  |
| C | 3.553695  | -0.109821 | 2.290259  |
| H | 2.959977  | 0.518276  | -0.125040 |
| C | 0.692972  | 0.597724  | -1.668780 |
| H | -1.218886 | -0.428720 | 0.023060  |
| H | 4.300262  | -0.234717 | 1.506082  |
| C | 3.714794  | 1.226186  | 3.002229  |

|   |           |           |           |
|---|-----------|-----------|-----------|
| H | 3.651292  | -0.946187 | 2.982788  |
| C | 5.092507  | 1.348494  | 3.648703  |
| H | 3.557621  | 2.038764  | 2.285953  |
| H | 2.934854  | 1.325430  | 3.764697  |
| C | 5.268422  | 2.681434  | 4.370206  |
| H | 5.238126  | 0.524397  | 4.355924  |
| H | 5.864864  | 1.241230  | 2.879185  |
| H | 6.256883  | 2.754359  | 4.829367  |
| H | 5.155103  | 3.518432  | 3.675415  |
| H | 4.520445  | 2.798828  | 5.159617  |
| H | -0.153591 | 0.119418  | -2.161429 |
| H | 0.518849  | 1.677583  | -1.658241 |
| H | 1.594491  | 0.405803  | -2.251956 |
| I | 0.647126  | 3.668560  | 1.403825  |

BMP I, ii)  
28

|   |           |           |           |
|---|-----------|-----------|-----------|
| C | 2.162030  | 0.215995  | 0.122905  |
| C | 1.103162  | 0.429580  | -0.739082 |
| C | -0.182396 | 0.305609  | -0.214079 |
| C | -0.367735 | -0.020428 | 1.120709  |
| C | 0.733049  | -0.215487 | 1.924769  |
| N | 1.968623  | -0.091187 | 1.416538  |
| C | 1.345347  | 0.740470  | -2.186144 |
| C | 3.146960  | -0.283719 | 2.290017  |
| C | 3.643230  | 1.040698  | 2.854414  |
| C | 4.853967  | 0.836889  | 3.763136  |
| C | 5.369091  | 2.151492  | 4.341051  |
| I | 2.732745  | -3.491523 | -0.125280 |
| H | -1.356652 | -0.127224 | 1.543222  |
| H | 0.662972  | -0.470823 | 2.972440  |
| H | 3.191899  | 0.280082  | -0.200889 |
| H | -1.041739 | 0.461250  | -0.855764 |
| H | 3.906866  | -0.784045 | 1.689110  |
| H | 2.849647  | -0.969630 | 3.082994  |
| H | 3.907730  | 1.711529  | 2.029928  |
| H | 2.833385  | 1.520957  | 3.414043  |
| H | 4.583144  | 0.156450  | 4.577553  |
| H | 5.652037  | 0.344810  | 3.196856  |
| H | 6.236263  | 1.983392  | 4.983576  |
| H | 5.669190  | 2.838567  | 3.544519  |
| H | 4.597783  | 2.646435  | 4.938211  |
| H | 0.685081  | 1.540667  | -2.524250 |
| H | 2.377836  | 1.042481  | -2.361430 |
| H | 1.140777  | -0.144358 | -2.794264 |



BMP I, *iii*)  
28

|   |           |           |           |
|---|-----------|-----------|-----------|
| C | 0.562261  | 0.352739  | -0.196945 |
| C | -0.255265 | -0.637027 | 0.350404  |
| C | 0.190827  | -1.406992 | 1.413482  |
| C | 1.451148  | -1.184941 | 1.923994  |
| N | 2.234388  | -0.233512 | 1.392329  |
| C | 1.813678  | 0.525677  | 0.363578  |
| C | 3.567400  | 0.041766  | 1.978004  |
| C | 3.500676  | 1.175288  | 2.991615  |
| C | 4.883023  | 1.480873  | 3.563186  |
| C | 4.850131  | 2.630774  | 4.564802  |
| C | 0.123096  | 1.198140  | -1.356246 |
| I | 4.706892  | 3.154519  | -0.454927 |
| H | -0.426636 | -2.178949 | 1.850403  |
| H | 1.862749  | -1.748115 | 2.749590  |
| H | 2.517397  | 1.274798  | 0.011200  |
| H | -1.244637 | -0.803814 | -0.059627 |
| H | 4.232548  | 0.302050  | 1.154017  |
| H | 3.920143  | -0.884454 | 2.431030  |
| H | 3.106110  | 2.069313  | 2.497184  |
| H | 2.807611  | 0.907703  | 3.796677  |
| H | 5.286643  | 0.582144  | 4.042388  |
| H | 5.557017  | 1.732366  | 2.737274  |
| H | 5.847375  | 2.835553  | 4.960975  |
| H | 4.481416  | 3.546136  | 4.092868  |
| H | 4.193170  | 2.399492  | 5.408567  |
| H | -0.855907 | 1.638189  | -1.158120 |
| H | 0.833377  | 2.001629  | -1.551511 |
| H | 0.039318  | 0.586338  | -2.257586 |

BMP I, *iv*)  
28

|   |           |           |           |
|---|-----------|-----------|-----------|
| C | 0.593530  | 0.331948  | -0.292384 |
| C | -0.257137 | -0.561834 | 0.361867  |
| C | 0.164765  | -1.225704 | 1.502110  |
| C | 1.435438  | -0.997760 | 1.985975  |
| N | 2.251139  | -0.142542 | 1.349414  |
| C | 1.853492  | 0.513745  | 0.243288  |
| C | 3.593855  | 0.122898  | 1.917425  |
| C | 3.528597  | 1.171598  | 3.019074  |
| C | 4.913944  | 1.442831  | 3.600156  |
| C | 4.866274  | 2.437208  | 4.756018  |
| C | 0.166958  | 1.068840  | -1.527951 |
| H | -0.479242 | -1.920871 | 2.022025  |
| H | 1.837985  | -1.476925 | 2.873227  |
| H | 2.579820  | 1.183534  | -0.197370 |
| H | -1.252782 | -0.736445 | -0.029291 |

|   |           |           |           |
|---|-----------|-----------|-----------|
| H | 4.235544  | 0.440755  | 1.095908  |
| H | 3.970471  | -0.822897 | 2.308774  |
| H | 3.096427  | 2.096325  | 2.621063  |
| H | 2.865341  | 0.809493  | 3.811912  |
| H | 5.343889  | 0.497225  | 3.947999  |
| H | 5.573152  | 1.820639  | 2.810902  |
| H | 5.865704  | 2.626895  | 5.154122  |
| H | 4.444418  | 3.394255  | 4.434748  |
| H | 4.246727  | 2.053564  | 5.571901  |
| H | -0.693478 | 1.705423  | -1.310697 |
| H | 0.969485  | 1.696052  | -1.915703 |
| H | -0.128506 | 0.362975  | -2.306893 |
| I | 3.457253  | -2.404262 | 5.141674  |

BMP I, *v*)  
29

|   |           |           |           |
|---|-----------|-----------|-----------|
| C | 0.557116  | 0.357472  | -0.220604 |
| C | -0.255450 | -0.634357 | 0.331750  |
| C | 0.192525  | -1.392662 | 1.401609  |
| C | 1.451744  | -1.162392 | 1.913789  |
| N | 2.231494  | -0.214972 | 1.369987  |
| C | 1.808379  | 0.536657  | 0.336484  |
| C | 3.566829  | 0.057715  | 1.951694  |
| C | 3.499058  | 1.179791  | 2.976744  |
| C | 4.872698  | 1.447577  | 3.585130  |
| C | 4.838037  | 2.581015  | 4.605332  |
| C | 0.107118  | 1.200851  | -1.377540 |
| I | 4.638892  | 3.198048  | -0.596821 |
| H | -0.423122 | -2.162583 | 1.844990  |
| H | 1.867825  | -1.706391 | 2.754798  |
| H | 2.510642  | 1.284256  | -0.021340 |
| H | -1.242637 | -0.809418 | -0.080428 |
| H | 4.230360  | 0.320828  | 1.127011  |
| H | 3.913366  | -0.867945 | 2.411681  |
| H | 3.124708  | 2.088219  | 2.491856  |
| H | 2.791234  | 0.902060  | 3.765706  |
| H | 5.235514  | 0.530750  | 4.062164  |
| H | 5.578484  | 1.692751  | 2.783827  |
| H | 5.825721  | 2.751478  | 5.040032  |
| H | 4.509171  | 3.514619  | 4.139364  |
| H | 4.146926  | 2.350508  | 5.421725  |
| H | -0.828910 | 1.708932  | -1.136427 |
| H | 0.853534  | 1.953169  | -1.633077 |
| H | -0.068685 | 0.576324  | -2.256270 |
| I | 3.471600  | -2.464955 | 5.189242  |
